# Supplementary material for: Bioinformatic Identification and Analysis of Hydroxyproline-Rich Glycoproteins in Populus trichocarpa
Source: PubMed Central journal article supplement (PMC5073881; doi:10.1186/s12870-016-0912-3), 2016-10-21
Supplement: 12870_2016_912_MOESM1_ESM.pdf [file 12870_2016_912_MOESM1_ESM.pdf]

## Supplemental Figure 1

>Potri.017G050200-PtAGP1C

MATSNILALVVLMLFLTSTMAQSPSSPTSSPTKSPVPPASTPTSAPPPTATSPPTSSPPVSPAPKKSPTTPPV  
ASPPSPTTVSPPPPASSIPPSSISNSPSDAPGPSANDAVLNRVTVGGSLLAGLFAAVLVI

>Potri.017G050300-PtAGP2C

MAGNKSIVFLMLITFLASSTIAQPPASSPATSPSKSPPKASSPAPSTVKPPASAPSPLETTPPPSADAPSPVTTTSP  
SPPPETAPSSSPTGVPTSTISDTPAAAPGPNSGAVLNRFAFGGSVAVGVFAAVLVL

>Potri.005G161100-PtAGP3C

MAYKTLVCLMLLALLAGSALAQAPGAAPTAQPTKSPSPAPAAPTTPPPAPTAPSPVPAPTAPSPVPAPTAPST  
PSSSPASSPPSPLAPGTGGGSIATPPSDTASPPSPSNADGLNRATMAGALIGVAVIDCNCDLLDDQLDLNSHFDIL  
TRETlse

>Potri.014G135100-PtAGP4C

MASFCSTFLAMSTVFMFAFFSSPALASQIHARISTISAAPAFLPVAPLSSPPTLSPDIEPLLPPTPGAGAPSPTESSL  
TIPSSRSPNPGDILAPGPARFSISPSGSLPASSSVSTSSGPLNLAFFLGLLVLCMQLSGV

>Potri.001G339700-PtAGP5C

MARQVLALALIFVAVVGAFAAEAPSATPLASPSPKASVAPAKAPTADTPKASASAPTISGAPSGSASSPVAEEGPAG  
APEEEISSPPAPASLSAEGPAGPAAGPIADVSDAPATPPAPQKDGAATIKISTAAVVAGLLVFLSF

>Potri.001G259700-PtAGP6C

MASPSRRHLVHAMVFGLLAINAAANIYDNEEPPSPPHDHEDPPLPYNHKNFVFQPSGLLNRGTPSPPRSQPPPNKKK  
MPPPPPKIHHLQPPQAKSPPPPPAKSPTLPSASPTPSSAPILPPLPSYISPVTSKVPPIPSPPSPSPASNL  
FPSPPYTSPASPPRISPIPSPPFPSPNLSQSHSHTPPTSPSK

>Potri.001G310300-PtAGP7C

MASTSVLMTLMAILLVGSTMARSSKSSPTPSPEAHVPAHSPTPAPASVPTPPSPSPSKAPPKAAPTAPTVGSPPS  
PPPSSTPAPANPTASYSPADAPKPSNAVLKQVSIQVLSVGLFAAVLVA

>Potri.001G367600-PtAGP8C

MLQHMHSVLLLLLVFAFCISNSNFTVNGDNAPAPSPTSSSIPKSPSSSSPSPSTTSPSSSPSKSPATSPSTSPPTLPV  
SPSKSPATSPSPSTSLPTIPVSPKSPATSPSPSTSLPTIPVSPKSPATSPSSSTSPSPTVSPPTPSPNAAAPSG  
SPPASSPAVSTPVTAPTLAPLGAPPMSTEGPVTAATPEASASIPSSSATPAEAPMVFPSSSSPSPSTESSMSPETA  
KVPSVNDESGSRSLYEVGVILSGLVGGALALAI

>Potri.001G310400-PtAGP9C

MAANKSMVFLMLITFLVASTKAQSPSSSPASSPTKSPPVATPPPKASAPAPTTPKPPASAPSPLETPPPAANAPSPT  
TTTTSPSPPLPVTVPVSTGDVPTSTIGSPAVAPAPANGAVLNRFALGGSVAVGVLAAVLVL

>Potri.017G047500-PtAGP10C

MASVHYLLIIAFFISIPLSCTNVALATRHLHSAKNVPPLPRPKLPPLPPNLTSPTTPVPTLPSPAETFGPPTLSL  
VPPSISVLTPPNPKTPPVTVESPTLPSPSTSMSPKDETPSTSSKSPPLNPISHKLPPLPKFPPVKSMPMPNPKS  
LPTIPKFPHLKWPSLPPFWIPKTLRVCTYHHVSGQRWRQPPAVIVLSRLAT

>Potri.002G207500-PtAGP47C

MASFCIFLAMFTVFMAYFSSPALTSQIHVQFSTISAAPAFLHDAPFSPTLSPDIEPLFPPTPGVGAPSPTESSIP  
TIPSNPSPNPDMLAPGPAGSSISPSGSLPAYSSVSLTSSGPLNLAVFLGLLVFCLVQPSGIM

>Potri.010G031700-PtAGP48C

DPILSTGTPFFLKQNFHYPHILLCLPSKCDIDFLIIRMASFCFFIVLIVPLMIFPLLSSTQLNSKTSYPPISTSP  
FLTNPSPSPQLQELSPDIAPLLPSPGGVLPSTVSSVPTIPSTPSPNPDEVVAPGPASAFSPPLGALPASSASPRNL  
INFIAVGCIAYSI

>Potri.008G182400-PtAGP50C

MASKVIVLALVFVAIVGLASAAGPAPSTTALPAEAPLSDDFIGTDDAAAAGAPSGGDAVVPGPMSVEAAGGPGSGP  
KSDSAALKFSAITGVAAGVAGYFFF

>Potri.015G093700-PtAGP51C

MARKLIVLALVFVTIVGLAAAAPAPSTTDFPPAAAPAPSTTDFTAEEAPLSNDFIGTDDGGAASAPSADGTTVVPG  
PMGSTAVAEAGPSEKDGVAATLKFSAVAGVAAVAGYFFFF

>Potri.012G095900-PtAGP52C

MAHKLIVLALVFVAIFGLAAAAPAPSTTYLPAAAAPAPSTTDLPAGEAPLSHDFIGTNDGDAAGAPSADGSTVVPG  
PMGSTTLAGGPASEKDGAAATLKFSAIVGAAVAGYFFF

>Potri.005G169000-PtAGP64C

MKRSLFIGCILATLALLANSAHHESSPRKSPAPSPSADCTDVAFDMLDCITYLSDGSEAAKPTASCCAGFEAVLSLD  
AECLCFALKHSADFGVALNLTRAAALSSKCGVSAPPLSKCGISVPAATGAPANPPSSVPEPAPPTESPYPVIEPATN  
NQPSAPAPAPSNSSDDNGVSAAAPVIEVPAQAPAKGMAYSISAPFSVLISCAVASTPLFLWV

>Potri.008G155200-PtAGP65C

MHHNFLHSSPTSIDPRYKNTHSHMERFVFPFRTVFPFLAVALAVFVFPVYGQINAACTASVLATFAPCMTFLTSTAN  
GSSPTAGCCGSLKNLTSDDGMDCLCLVVTGSPVFGVPIINRTLAISLPRACNMPGVVQCEATGAPIPAPAAVVPEPTP  
SALPPASGTTPLTPPSSSTGDSGAPASTTGSHPVLTPPSASVPSDSLSPSLLLALGFVLFKYYY

>Potri.005G212000-PtAGP66C

MEGLRVFNLIAILSTLLVISVNGQISTPCTTSMISSFTPCINFIGSTNNGSSPTGSCCSSFKSLMSTGMDCACLLI  
TANVPLQLPINRTLAITLPRACKMSGVPMCKASGTPLPAPGPVLLGPTLPPTAAYPLSPRASKAVALAPAPESEIT  
LPLTPASPPEPVEAPPATAGIRPVLSPSASMPSPVSPSSLLIFLAIMVFKFY

>Potri.002G050200-PtAGP67C

MEGLKVIKLMALLSTLLVISVNGQINTPCTMSMISSFTPCVNFITGSTSNGSPPTASCCSSSLKSLMSTGMDCACLLL  
TANVPVQLPINRTLAISLPGACGVPGQCKSSGTPLPAPGPFSLGPTLPPAAAPLSPRASKAVALAPAPESEITLPL  
TPASPPVQVASLPTTAGIRPVLSPPASMSHVSPSSLLIFLAIMVFKFY

>Potri.010G085400-PtAGP68C

MAHTAMSMGLTMVLVTMLWAGAMAQSDCTNVLISMSPCLNYITGNSSTPSSQCCTQLASVVRSSPQCLCQVLNNGGS  
SLGIEVNKTQAIALPGACNVQTPPISSCNGASPAASPAGTPEASSTPSGTASKTVPSTQTDGTSGGSSLDIFSISLLF  
FLLFAASYGSTFTVIF

>Potri.008G155100-PtAGP69C

MAHTAMSMGLTMVLVTMLCARAMAQSDCTSVLISMSPCLNYITGNSSTPSSQCCTQLASVVRSSPQCLCQVLNNGGS  
SLGINVNQTQAIALPGACNVQTPPISSCNGASPAASPAGTSEAPSSPSGTGSKTVPSTQTDGTSGASSIEFSIPLLL  
LLLFAASYGSAFTKVF

>Potri.009G092300-PtAGP11K

MMLKKAVILLSLICISIAAGVSGQAPATSPTATPAPPTPTS SPPPATTPPPVSAPPVPTQ SPPPATPPPVSAPPATP  
PPATPPPATPPPATPPPATPPPATPPPATPPPAPVPPAPLAAPPALVPAPAPSKPKLSPAPSPLALSPSPPTGAP  
APSLGASSPGPAGTDMSGVEKMGSVQKMLSLVFGSAFWLLT

>Potri.010G132500-PtAGP12K

MASVLWALILACLSPFLAITDAQTPAVSPSTPTTTTPPTTTPTTPTQSPASAVTPPTATTPISSPSPKVAPATTPV  
VPPPQPPQSSPAATPIPPPATPPPQVSPAPAPATPPPAPAPAKEVPAPAPATPPPAPVPAPAIPPPAPSPSLVPSA  
PAPGKHKMKRKHKHHHAPAPAPNPPSPAPPTVTTASEDTAPAPSPNGGNTLYHQEGRARMWARMWARTVLAF  
SLLVVTGYSF

>Potri.007G051600-PtAGP13K

MDRNGILGWTLICVLVAGVGGQAPAATPTSTPATPTTPSVPLAAPAKAPAKPTTPAPVSSPPAVTPVASSPKQTVPT  
PVATPLATPPPAPVTPVSSPPAPVPVSSPPEKSPSPVPVAPPTSSPVAAPTAEVPAPTPS KKKPKKAPAPGPALLSP  
PAPPTPEAPGSAESMSPGSIADDSGAGRTRCFQKIAGGLALGWLLALIF

>Potri.005G144900-PtAGP14K  
MDRNGMLGLALLCII IAGVGGQAPAAATPTSTPATPTTPAVPVAAPT KPTTPAPVSSPPAATPAASPPKQTVSVPVAA  
PLATPPPSATPVSSPPTPVVSSPPAKSPSPPEPVASPTSAPPASTPVAPPTAEVPAPSHS KKKPKKHQAPAPGPAL  
LSPPAPPTEAPGPSAESVSPGPSLSDNSGAETKRCLQKMAGGLALGWLLALIF

>Potri.008G111000-PtAGP15K  
MALVLWALIVACL SFPLAITDAQTPAASPSTTSPATPAPTTTTPPPSTTPAQSPISAMTLPPATTPISPPSPKVAPA  
TSPIVPPPQPLQSPPTAAPIQTPALPPPATPPPSLPPATPPPSLPPPRVSPAPAPAPAKETPSPSPAKEVPAPAPA  
PATPAPTAPAPATPAPAPAI PPPAPSPALVLSAPAPAG KHKKKRKHKKHKKRHHHAPAPAPNPPSPPAPPTVTTVS  
EDTAPAPSPNPNNGNSLYHHEGWAGMLTRTVLAIAYLLVVTGYSF

>Potri.008G195700-PtAGP49K  
MASFWFLTALIVPLVIFSPSSSSSTQLNSKTSPYPISTSPAFLTNSPPIPPFQELSPDIAPLLPSPGGVLPSPPTV  
SSVPTIPSTPSPNPNDEVVASGPD SAFSPLGALLASSAAPRN LINSVIVVGFIA YRSIQLFKIKKHNSLTSASLEKL  
VPLQLGHVTGVSMNIVPVLARKGFSDPGWSSNWI PAGTWF

>Potri.009G063600-PtAGP16P  
MEMKKIACAILFAAASVS AVMADEVAAPAPSPASGASASLP IVGSLVGASLASFIALYLQ

>Potri.009G062700-PtAGP17P  
MAQLVCTFKAMAIFFV VAMYFATVTAQDLEME PAPAPTMDKGAAYSLGMSAAVFCSSLLLSLLAFLKH

>Potri.009G063200-PtAGP18P  
MAFAAMKLF AAAVVMAMLASVAVSAQDLGELAPAPAPGKDKGAASFSLGMSGALICSSLFLSMLSLLRH

>Potri.009G063000-PtAGP19P  
MAFAAMKLF AAAAVVMAMLASVAVSAQDLGELAPAPAPGMDKGAASFSLGMSGALICSSLFLSMLSLLRH

>Potri.013G057500-PtAGP20P  
MEALKMRVFLAI VVVLMAVSAVQNVA AAEAPAPSPTSDATTFVPAVLASLVALAFGQLLF

>Potri.003G136600-PtAGP21P  
MAGVSRVVA AVVALLVVF AIVLPIAQAQAPAPAPTSDGTSIDQGIAYVLMVALALTYLIHAADLSHSF

>Potri.006G056000-PtAGP22P  
MAAQVIIPKAFLLFLVIAAF AVVSAQDSEMAPAPAPGMEAGAGFSLPVSGAIVGFSLVVSLLGFLKH

>Potri.006G055700-PtAGP23P  
MAKVSVSKAVLFTFIVAMLSVAASVSAQLAPAPAPSMNTGTGFSLPAPGVIVGFSLMVSLLAFLKL

>Potri.006G056200-PtAGP24P  
MELKKISCAVLVVAASMSAALADEISAPAPSPTSGASATLPVVGSLIGASLVSFFAYYLQ

>Potri.006G055900-PtAGP25P  
MAATQVTL SRAFLLLLVI VTF AVVSAQESEM APAPAPMDAGAGFSLPVSGAIVGFSLVVSLLGFLKH

>Potri.006G055500-PtAGP26P  
MAKVRI SKDIMVIYVVALFMVATNVSAQVEAPAPAPAPSMDTGAGFSLPVSSAVITFSLIISFISLLKL

>Potri.006G055800-PtAGP27P  
MAATQVTISR AFLLLLVI VTF AVVSAQESEM APAPAPMDAGAGFSLPVSGAIVGFSLVVSLLGFLKH

>Potri.016G052400-PtAGP28P  
MVTQVIISKAFLLLAIAAF AVVSAQESEM APAPAPGMDAGAGFSLPVSGAVVGFSLALSLLGFLKR

>Potri.016G052200-PtAGP29P

MAQFSIPKALVLMVLVIATFAAAVSAQDSEMAPAPAPGMDAGAGFSLPVSGAIVGFSLVVSLGFLKH

>Potri.015G022600-PtAGP30P

MAVSNISFGVLAIVAMICAIIFMPLAHGQSSAPAPSPTSDGTAIDQGIACILMLVALVLTLYLNH

>Potri.015G139200-PtAGP31P

MAALKSLAPQAALLLLLVALAVLQAQLAQSQQCVSQLNRLNVCAPFVTPGASYEHQS

>Potri.002G226300-PtAGP32P

MKLFQLCLIVALLIVFGSSPRRSHAIRGSSSAPSTSQQVFRSPFSPSPFAQRAEEFASQKRRVPAGPNPLHNKR

>Potri.019G035500-PtAGP33P

MEALKMRVFLAIMVVMALSAVQDVAAADAPAPSPTSDATTFVPAAFASLVALAFGLLF

>Potri.014G156600-PtAGP34P

MKLFHLFLLLALLIFFSSTPRSSHAARRSFSAPSTSQQVFRSPFRASPFPAERAKEFESQKRKVP TGSNPLHNKR

>Potri.014G094800-PtAGP35P

MAVCASFKAFAVLAVVSLILAVVSPSVEAQSPAPAPAPTS DGTSIDQGIAYLLMLVALVLTLYLIHPLDASSYTF

>Potri.T142100-PtAGP36P

MADKTRSFMLTFFTUVLLLLLHQHFDLTAASRPLDIHSPAIPRSGSEPPPTDVHDRWYRINRYKNLESDAFRPTTPGH  
SPGVGHENPPAAP

>Potri.001G387800-PtAGP37P

MARLATLALILVLVFSFSHSPEARKLLEGLTVLNLRSKLGASPRGEGNPITSSASRKLTTLHLAETERFLLAAPSPGIG  
N

>Potri.001G268400-PtAGP38P

MAQLASTFKAMAIFFVVMYSATVTGQDFEMAPAPAPTMDKGAACSLGMSGAVFCSTLLLSLLALLKH

>Potri.001G268500-PtAGP39P

MEFATMKFLAAVLVMAMFASVHVSAQDFGEMAPAPAPAIGAGAASYSFGTSGALICSSLFLSMLALLRH

>Potri.001G094700-PtAGP40P

MAGVSRIAVAVVALALASAFVLPVAQAQAPAPAPTS DGTSIDQGIAYVLMVALVLTLYLIHAADLSHSF

>Potri.001G268800-PtAGP41P

MEMKKIACAILFAAASVSVMADAEVAAPAPSPTSGASVSLPVVGSVLGASLASLIALYLQ

>Potri.001G268900-PtAGP42P

MASMKLSLLASLVFVAVVCSKLAVLAYDDVLAPMPAMATGSAAGYSASVAAMGFSLMVYVFEVMLH

>Potri.001G259500-PtAGP43P

MASPSRCHLVHAMVFGLLA INAAANIYDNEEPPSPPHDHEDPPLPYNHKNSVFPQPSGLLNRGTPSPP

>Potri.001G004100-PtAGP44P

MEAMKMKIFVVLVLMVLMFSTMQKAAAADAPAPSPTSDATIFVPTFLASLVALAFGLLF

>Potri.012G032000-PtAGP45P

MAVSNISFGVFAAIVAIIFAI SMPLAHGQSSAPAPSPTSDGAAIDQGVACILMLVALVLTLYLIH

>Potri.012G144100-PtAGP46P

MTLGRCLTKLFACLILPLPIEAMASQHTYIPHCIPISSVPYGAAPPQIPPPPLSSFNTSPFINHHDFLVFPAAEIQC  
STPPTVILTTP

>Potri.016G052300-PtAGP53P  
MSKDRSLRHSFCLKPEPKLHRKIRKQLISLVSLIYLLLLLSMAAQVIVSKTFLLVLVIAAFVAVASAQDSESMAPAPA  
PGMDAGAAGFSSPVSGAIVGLSLIVSLLGFLKH

>Potri.003G220900-PtAGP54P  
PTKEHWTAVWQPLSLPPCSHTSLQNLISLPLYICAPTPTHKHLPTSTFLQAVVSILSLQLLSKQISFQRGIVVFLSLLN  
NKKMEAMKMKVFAVLMVVLMAFSTMQKATAANAPAPSPTS DATIFVPTFLASFVALAFGFFL

>Potri.006G056100-PtAGP55P  
MAQFGGSFVHIVMAMVVVALHSCGMMAQSIAPTAMDAGAGLELPVSMIAIVSSSMILSLLALMLQ

>Potri.016G052100-PtAGP56P  
MARFGGSFTRIVMAMVVVALLRICGVMAQDIAPTAMDGTAGLELPVSMIAIVSSSMIFSLALMLH

>Potri.010G244900-PtFLA1  
MAIALSSFNIFFTFLLVSTFHLGFSFALSQENHSNGTYSGQINSNSVLVALLDSHYTELAELVEKALLLQTLLEDAVG  
KHNITIFAPKNEALERDLDFEFKRFLLPEGNLKSLOTLLLYHIVPNRINPSHNSLQHHSTLCRDRVKLSSQESGEK  
LIDSAKIIQVNAVERPDGVIHGIERLLIPRSVQQDFNNRRSLQSI SAVKPEGAP EVDPRTHRLKKPAPPAKPGSAPV  
LPIYDAMAPGPSLAPAPAPGPGGPHHHFNGEKQVKDFIETLLLYGGYNEMADILVNLTSLATEMGRVSEGYVLTVL  
APNDEAMAKLTTDQLSEPGAPEQIIYYHVIPEYQTEESMYNAVRRFGKISYDTLRLPHKVLAEADG SVKFGHTENS  
AYLFDPDIIYTDGRISVQGIDGVLFPLEEKEKSETKKEIKSVKVAVKPPRRGRLLLEVACRMLGTFGQDSHFTTCQ

>Potri.009G012200-PtFLA2  
MRQSFILALSLIFFFLHCTKTLCSPPAAAPAMAPPKTPVATSPGPVVDVNKILQKAGHFTVFARLMQATTEDTELNK  
ELNTTNGITIFAPTDNAFSSSLKAGFLNLSLSEDEKTELVKFHVLPAFISTSQFQTVSNPVRTQAGTGPRVTLNVTTT  
GNFVNISSGLTNTSISGTVYTDSQLAIYQLDKVLFPLDIFTPKPPAPAPEPALGKPRKAAPDAESPTAPKDISGAPA  
LLFLHNNALLLAVSCAFGAIHS

>Potri.013G120600-PtFLA3  
MATTPLSFFLLSLLSLNAQAQTPTAPAPTSPGPVNFTAVLVKGGQFATLIRLLNNTQTLNQIENQLNNSSEGMLL  
FAPTDNAFNNLKAGALNGLNQEQVQLLQYHTLPKFYTMNNLLVSNPVPTQASGDGVWGLNFTGQSNQVNVSTGL  
VEVQINNLRQD SPLAVYPVDKVLLEALFVGKPPPTASPPAPSSKSNSTVAAAEPSTGKN SAGGRNVALGLVVGGL  
VCMGILS

>Potri.013G152200-PtFLA4  
MASC SHWWWAPVYFIASAVLAFIAI STAMNSP SNNATRPTPTS NYLSLNASRTLRESGFNIMATLLLI S P E M F F L S  
PNTFLFAIKDSSLVNTSLPPWFLKNLLQYHTSPLKLSMEDVFKK PQGSCFPTLVDRKKLAVTKIDAKERLAE INHVL  
VSHPDMLERRITIHGVLAPFSSLRSKDVYFGWESI QAPICDANSSLVSDANGPRIILEWTRIIHLLSSHRFV SFAI  
GLNSVLDRIADHKNLSSVTIFAPPELEFVASS SPMLEKIVRLHILPQRATYIELAALPDKQRLRLLPDEDLKITK  
GVGVTQGLAINGVEIAAPEIFSSKEFIVHGITQAFKIAKFPNASR

>Potri.011G093500-PtFLA5  
MQRLTILLSLLFLLSTSTTFTRGHNITHILGKHPSFSTFNHYLTLTHLAGEINSRNTITVCAVDNAAMSELLSKHPS  
IATIKNILSLHVLLDYFGTKLHQIREGTALAAATMFQATGSA PGSTGFVNITDVKGGKVAFGPEDNEGNLDV F Y V K S  
LEEIPYNISVIQISKVLPDVAAPPTPEPSAMNITDIMS AHGCKVFADTLIANPEASKTYQDSVDGGLTVFCPLDDP  
FKAFFPKFKNLTASGKVSFLEFFGVPIYQSLAMLKSNNIMNTLATDGEKKFDFTVQNDGEDVTLKTRSITAKIVGT  
LIDEQPLAIYTIKVLKELFKAAPTPAPAPAPEKEVADAPKSSKHKKPS SDVVPSPADSPDGDLADQ TADDNA  
SVTLYGGRLVAMLLSLCSGLLLL

>Potri.006G200300-PtFLA6  
MDSHIYGVSKTLLLFLLCLSVSSISALPHQNKGTGNSGTGQMINSNSVLVALLDSHYTELAELVEKALLLQTLLEE  
AVGKHNITIFAPRNEALERQLDPEFKRFLLPEGNLKSLOTLVLFHIIPQRVGSNDWPGHKS NPSRHTTLCNDHLHLI  
TKNSGKKVVGSA DVTRPDDVTRPDGVIHGIERLLVPQSVQEDFNRRRNLRSISAVLPEGAP EVDPRTHRLK KPEPPV  
RAGSPVLPPIYDAMAPGPSLAPAPAPGPGGPHHHFDGESQVKDFIQTLLLYGGYNEMADILVNLTSLATEMGRVSE  
GYVLTVLAPNDEAMAKLTTDQLSEPGAPEQIIYYHIIPEYQTEESMYNAVRRFGKIGYDTLRLPHKVAAQEA DGSVK  
FGSGDGSAYLFDPDIIYTDGRISVQGIDGVLFPEVEKESTSVKKS SVSVKVATTKPRRGKLM EVACIMLGTLGQDSRF  
TTCQ

>Potri.006G129200-PtFLA7

MRKQLLSPFVFPFLMFFLYGSTTVAQTSPSPASGPTNITAILEKAGQFTTLIRLMKSTQEADQINTQLNNSNQGLTIVF  
APPDNAFTNLKAGTLNSLSDQQKVQLVQFHIIIPNFFSMSSFQTVSNPLRTQAGNSADGEFPLNVTTSGNQVNITTGV  
NTATVANTIFTDQQLVYVQVDQVLLPLDLFGTAAAPAPAPAPSKPKDKVPAKAPAGSKEDASVDASGATIATVSVSVVL  
IAAISLKL

>Potri.016G066500-PtFLA8

MDSHIYGVSEKTLFLFTLLCFSVASISALPHQNRGTNSTVTGQMINNSVSVLVALLDSHYTELAELVEKALLLQOTLEE  
AVGKHNITLIFAPKNEALERQLDPEFKRFLLEPGNLKSLQTLFFFHIIIPQRVGSNDWPGHKSNPTRHTTLCNDHLHLI  
TKNSGKKLVGAAVLTRPDDVTRPDGVIHGIERLLVPQSVQEDFNRRRNLSISAVLPEGAPEVDPRTHRLKKPEPPV  
RAGSPPVLPVYDAMSPGSLAPAPAPGPGGPHHHFDGESQVKDFIQTLVHYGGYNEMADILVNLTSLATEMGRVSE  
GYVLTVLAPNDEAMAKLTTDQLSEPGAPEQIIYYHIIPEYQTEESMYNAVRRFGKIGYDTRLRPHKVVAQEADGSVK  
FGSDGSAFLFDPDIYTDGRISVQIGDGLVFPVEVEKESTSVKKSVS SVKVATTPPRRGLMEVACRMLGSLGQESHF  
TTCQ

>Potri.016G088700-PtFLA9

MRKQLLSPFVFPFLMFFLYSSTTFAQTSPSPASGPTNITAILAKAGQFTTLIRLLKSTQEADQINTQLNNSNQGLTIVF  
APTDNSFANLKAGTLNSLSDQQKVQLVQFHILPNFLSMSNFQTVSNPLRTQAGNSADGEFPLNVTTSGNQVNITTGV  
NTATVANTIIYTDQQLVYVQVDQVLLPLDLFGTAPAPAPAPSKPEKDVPAKAPAGSKEDASVDSSGASIA TVSFGVVL  
IAAISLKL

>Potri.015G129400-PtFLA10

MVPQFLFSASFILFLLHCPPTLAQSPAAPAPPGPTNVTKVLEKGGQFSVFI RLLKATQEDVTLNGQLNNTNNAIT  
IFAPSDNAFSSLKSGTLNSLSDQEKAELVQFHIIIPQFLSSSQFQTVSNPLTTQAGSGRLELNVTTTGNNSVNITTGL  
TNTSVSGTIYTDNQLAVYQVDKVLPLDIFTPKPPTPAPAPEKPKKRSKAAASPE SPADTSGAVSFTVLNNVVFVFGV  
CMVAIYSL

>Potri.T130300-PtFLA11

MDSKVSSLLFIAILCLISSTSTAFNITKILAQYPEFVSNFNDLLTQSGLAKEMSSRETITVLALDNSSIGGLNGRPLD  
IAKRILSAHVILDYDQIKLSKLLKASTIVTTLYQASGAADDRQGFLNISRTAEGIKFGSAVKGAPLVA SLVKPVYA  
QPYNISVLQVSEPIEAPGIENMAPP PPAAVPKKAPAPTAKSPSKAPAPSKVEPSTPTESPTEGPVAADGPVADVPT  
ASPLADAPTADETTAEAASSQMHAGGAVVVIGLLACMMGF

>Potri.002G223300-PtFLA12

MEFSMIIMFSSTLLFLCTPVAYAQTAA SPPAPTPTPSSSPAPAPTTPYVSLTDLLSVAGPFHTFLSYLESTKVVDTF  
QNQANNTDEGLTILFVPKDDAFK NLKPKPSLSNLTQDQVKQLILFHALPHYALADFKNLSQVSPVSTFAGAGGYALNF  
TDVSGTVHLD SGWSKTKVSSSVHSTDPVAVYQVDKVLPEAIFGADIPAPAPAPAPETS LAADSPSSDSTGDGSAP  
GTSPPNSSYRIFGVDIWSQLVLLALIGVLVFL

>Potri.019G122600-PtFLA13

SYTAWHHTNVTKILEKAGHFTIFIRLLRSTQEENHLFSALNDSSTGLTIFAPTDSA FSELKSGTLNLTSDGDKSELV  
KFHVVPTFLSTSQFQTVSNPLGTWAGTGSRLPLNVTSYPNVSNITTGLTNTSLSGTVYTDNQLAIYKIEKVLLPKDI  
FASNAPAPAPVAPAPEKPTKAVPAVTVE SPAAPVDISSAVWFMHNNVVG SVGIVAATVFSL

>Potri.019G120800-PtFLA14

SPAAAPAHAPAVVVTQPPAATPAQAAAPHGITNIHPRGNHLFSALNDSSTGLTIFAPTDSA FSELKSGTLNLTSDGD  
KSELVKFHVIPFTFLSTSQ LQTVSNPLGTWARTGSRLPLNVTSYPNVSNITTGLTNTSLSGTVYTDNQLAIYKIEKVL  
LPKDI FASHAPAPAPVAPAPEKPAKAVPAANVESPVAPVDISSAVWFMHNNVVGFMESVE

>Potri.019G093300-PtFLA15

MATSPLSLVLLSLFLSLSLHAQAQAPAAPAPAPSGPVNFTAVLVKGGQFVTFISLLNKTQTFNQIENQINSSSEGMI  
IFAPTDNAF SNLKS GALNGLSQQQVQLLQYHMLPKFYSLNLLLVS NPVPTQASGQEGVWGLNFTGQSNQVNVSTG  
LVEVQVNNALRQDFPLAVYPVDKVLPLDELFGVKPPSASPPAPATKGS SSGKSNSSDTAAEPSGKNSAGGRNALG  
LIFGLGFVSMGILS

>Potri.014G168100-PtFLA16

MPRPLPLLLTLAISLVLLASTTTVNAHNITRILAKHPQFSTFNHYLTVTHLAAEINRRQTITVLAALDNAAMSSLI SKQ  
LSVYTLRNVLSLHVLVDYFGTRKHLQITNGTELTATMFQATGSAPGASGYVNITDLNGGKVAFGAEDNDGKLNNAVYV  
KSLEEIPYNIISILQISQPLNSAEAEAPTAAPTTLNVTAILSNQGCKAFSDLLIASGAHTTTEENVGGLTVFCPTDPV  
INGFMPKYKNLTAAPQKVSLLLYHGIPYIYQSLQMLKTSNGIMNTLATNGANKYDFTVQNDGEVVTLETKVTTATITGT  
VKDEEPLVYKINKVLLPRELFKAAPKAPAPKGEKDVADGPNADAPSDDESDDQTADNDNGVNKMGGRRLAVVAPS  
FFFVGMFFLFD

>Potri.014G071700-PtFLA17

MATLQYSLLLSFTLSALVSTILAHNITDILSGFPEYSEFNKYLTQTKLADEINTRQITVLAALNNGAMTALA AKHPL  
SVIKNALSLLVLDYDPTKHLQISKGTTLSTTLYQTTGNAPGNLGFVNITDLQGGKVGFGSAAPGSKLDSSYTKSV  
KQVPYNIISILEISQPIIAPGILTAPAPTSSVNITALLEKAGCKTFASLLQTSGVIKTYQSAADKGLTIFAPNDEAF  
KAAGVPDL SKLTNAEIVSLLQYHATATYSPFGSLKTSKDPISSTLASNGAGKFDLTVTSAGDSVTLHTGIGPSRVAET  
VLDS TPLVIFTVDNVLLPVELFGKAPSPAPAGEPVSAPSPSPVAS SPAPASVEAPSPLAASPPAPPVETPPGGAPAET  
PFGSENSTADGSAAVHVSVPVQVTVFATVICSILMS

>Potri.014G162900-PtFLA18

MKFSMIIVLSSTLLFSCTPLAYAQKVASPPAPTPTSPAPAPSPPYVNLTDLLSVAGPFHNFLNYLESTKVIDTFQ  
QANNTDEGLTIFVPKDDAFKNLKKASLSNLTQDQLKQLILFHALPHYYSLSDFKNLSQVSPVSTFAGAGGYALNFTD  
TSGTVHLD SGWSKTKVSSSVHSTDPVAIYQVDKVLLEPAIFGTNIPPTPAPAPAPDTSPPTADSPSTSDSAGAGSAPG  
KSPPNSSYRINGVGIWSQLVLAIAAGVLVFL

>Potri.008G012400-PtFLA19

MAMAPSPCCIHIFFASILLSNFHLGFS SSSSTLQENHSNGSYSGQINSNSVLVALLDSHYTELAELVEKALLLQTL  
EDAVGKHNITIFAPRNEALERDLDPFEKRFLEPGNLKSLQTL LLYHI VPNRINLSHNSLHHHSTLCRDRIKLGSQ  
SGEKLIDSAKIIQVNAVERPDGVIHGIERLLIPRSVQQDFNNRRSLQSI SAVKPEGAPEVDPRTRQLKKPAPPAKPG  
SAPVLP IYDAMAPGPSLAPAPAPGPGGPHHHFNGERQVKDFIETLLLYGGYNEMADILVNLTSLATEMGRVSEGYV  
LTVLAPNDEAMAKLTTDQLSEPGAPEQIIYYHVIPEYQTEESMYNAVRRFGKISYDTLRLPHKVLAQEADGSVKFGH  
AENSAYLFD PDIYTDGRISVQGIDGVLFPLEEKEKSDTKTEMKSVKVAAPQRRGKLEVACRMLGTFGQDSHFTTC  
Q

>Potri.001G320800-PtFLA20

MERLQHLLISLYLLILSINLTTTQAQSPAPAPAPPGPTNVIKILKKAGHFKTFIRLLKSTQLDSNLNSQLGNTNNG  
TIFAPSDSAFSAKLTGTLRSLTDQEKVELMQFHI VPMFISSSQFDTVSSPLKTHAGSGARFQLNVTASGNSLNI STG  
LTNTTISD TVYTDTHLAIYQVDKVLPLDIFTPKPPPAPAPAPKPKLKAESESPDDAVSKKDISSAVSFVMHHD TVFF  
TVGTVVAISFSL

>Potri.001G037800-PtFLA21

MSLKSSSLFALCFSSFLFNTRASNITQILSQYPDFSTFSSYLTQTQLAGEINSRQITVLAALVENGMMSPLSGKPN  
GEIKNVLSGHVILDYDVAKLQKLQNKTA MLTTLFQSSGQAKGQGFNLVTVLGSNSVAFGS AVPGSSLSNLVKS  
SSQPYNISVLQVSNIVSAGTGNANSTTSPVPVGP PKTSPTPAS SPNKPPSTSNPPRP SPPTADGPAADSPAPSP  
AMDGPIAATPAADGPLADAPLDPKS DASVLTGNNLALLALILLSAFFLA

>Potri.001G367900-PtFLA22

MQLTVLLSLLFLLSTATTITYGHNITSILGQHPSLSTFNHYLTLTHLAGEINRRTITVCAVDNAAMSEILSKKPSI  
STIKNILSLHVLDDYFGTKKLHQIRDGTALAATMFQATGSAPGSTGFVNITDVKGGKVAFGPKDNGGNLDVYVKS  
EIPYNI SVIQISKLLPSDVAAAPTPEPSAMNITDIMS AHGCKVFADTLIANPDASKTYQDTIDGGLTVFCPLDDPF  
KAFLPKFKNL TASGESLLOFFGVPVYQSLAMLKSNNGIMNTLATNGDKKFDFTVQNDGEDVTLKTRGTTAKIVGTL  
IDEQPLAIYSIDKVL PKELFKAALTPAPAPAPEEAADAPKSSKHKKPSADDAPSDSPADSPDGDAADQTADNNSV  
RLDGGRLVAMVLSLCLGLLML

>Potri.012G127900-PtFLA23

MVPQFLLSFLSILSFLHCPPTLAQSPAAPGPPGPTNVTKILEKGGQFSVFI RLLKATQEDVTLNGQLNNTNNAIT  
IFAPSDNAFSSSLKSGTLNSLNDQEKAELVQFHII PQYLSQQFQTVSNPLTTQAGSGRLELNVTTTGNVSNIT TGL  
TNTSVSGTIYTDNQLAVYQVDKVLPLVDIFTPKPPTPAPAPEKPKKRSKAAESPDAPEDN SGAVSLTVLNDVVFFGV  
GIVAAIFSL

>Potri.001G440800-PtFLA24

MAKYLFSFLLLLTTTATSTFNPICTFSPTPSPTSATTAPITNSSTNIALSPTFAPSPIITITPTPAPSSAPTINN  
TTTTTTTTSTTLTPPTTPSTARTTPIPTNKITLTPTFAPSRAPTPTIITPILGSPAPTPISSSAFTTTPTFGSPAP  
TPTNSSIFTATFSLPPTTPSTFTRQDDLKVFVQEYIYNIIDAILGTGDFKNWANALGMADSTTFPI SATFFIPSDN  
SLSPPTTSADPDIFPYHIVPQRLSFADLQQFKTFSRLPTLLFDKSILITNNSASNFTLDGSRLLTHPDIYTNAAITVH  
CIDNLLDHSVYGTESGKNSSKPDVAGPPPTPASPPRPTPRTFVPSTADDEEFTVHQHGESDAACLCTEVWTVFLVLC  
VALASKFQRMILVH

>Potri.018G005100-PtFLA25

MDFKVSSLLFIAILCLISSTSTAFNITKILAQYPEFVSNFNDLLTQSGLAKEMSSRETITVLALDNSSIGGLSGRPLD  
IAKRILSAHVILDYDQIKLSKLLKASTIVTTLYQASGAADDRQGFNI SRTAEGIKFGSAVKGAPLVASLVKPVYA  
QPYNISVLQVSEPIEAPGIENMAPPPTPAAVPKKAPAPTAKSPSKAPAPSKVEPSTPTESPTEGPVAADGPVADVPT  
ASPLADAPMADETTAEAAASSQMHAGGAVVIGLLACMMGF

>Potri.006G276200-PtFLA26

MIHQYCHCYCWLKTLNRYKRLSTLLFIPYITRPLILICRLNSFSTMNSPATHFWSTSLHAYKGLCIIISFEFKHKGS  
DNNKEGFGFIFLAKMDSKASSLLFIAFLCLISTSTAFNSTKILAQYPEFANFNDDLSSQSGLAQEMNSRQTITVLVLD  
NGSIDGLSGRPLDIAKRILSAHVILDYDQIKLSKLLKASTIVTTLYQASGVADNRQGFNI SRTAEGIKFGSAMKG  
APLVASLVKSIYSQPYNISVLQVSEPIETPGIENMAPPPTGTAAPVKKAPAPAPSTKTPPAAPTAKTPAKSPAKS  
PSKAPAPSKGEPSTPTKAPAEGPVAADGPVAAGGPVADVPAESPEADTEVAEEAPAVAPAKAASSRMHVAGATVVIG  
LFACIMGF

>Potri.012G015000-PtFLA27

MKHHFVFLFPAILLLLHCTQTLSTQPTAAPAKAPAAASAPPAAATSSAQASPPVMVPVQVSKGPVNVIKILQKAGG  
FAVFIRLIKSTQEDIQVFSQLNDSRDGVTIFAPTDFGAFSAIKSGVLNLSLSDHQKIELVQFHIIPKILTTANFQTVS  
NPITTLAGSGSRFALNVITTENMVNVTSGLTNTSVSAIVYTDSQLAVYQVDKVLPLDIFAPKPLAPAPAPPKPKKD  
DGAESPLVPEDTSSAVSCIPLNSLIIFGAGMVAAVFTL

>Potri.013G014200-PtFLA28

MKQOYSLFSFSFLLFLHCTTTFAQTSPAATPAQAPAVVVAQPPAATPTQAAAPHGITNVTKILEKAGHFTIFIRL  
LRSTQEENHLFSALNDSSTGVTIFAPTDSAFSELKSGTLNLTSDGDKSELVKFHVVPFTLSTSQFQTVSNPLGTWAG  
TGNRLPLNVTSYPNSVNITGLTNTSLSGTVYTDNQLAIYKIEKVLLPKDIFASKAPAPAPVAPAPEKPTKAVPAAT  
VESPVAPVDTSSALMFTQNHVVGVAIFAAAMFAL

>Potri.019G121200-PtFLA29

MKPQYLLSSFSILLFLHCTNTFAQSPAAPAQAPAVVASPPAATPTQAAAPHGITNVTIILEKAGHFTIFIRLLRS  
TQEENHLFSALNDSSTGLTIFAPTDSAFSELKSGTLNLTSDGDKSELVKFHVVPFTLSTSQFQTVSNPLGTWAGTGS  
RLPLNVTSYPNSVNITGLTNTSLSGTVYTDNQLAIYKIEKVLLPKDIFASNAPAPAPVAAAPEKPTKAVPAVTVES  
PAASVDISSALIFTHNLLVGSVGLLASAMFSL

>Potri.006G174900-PtFLA30

MARINPAISQITPTTTLYFLLLLLATTTTIIPILAITNLTALLSSFPDFSSFTSLLASTPSITSDLSNRSALTLLV  
IPNSYLSSSLDFTRRLSPSSLTDLLRYHILLQYLSSDDLHQLPAGALITTLFQTTGRASSNFGSVNITRNPVTNAI  
TISSPSPFSSSNATVLSLIKTLPNVSIISVNSLLVPYGFDLMASETRPTLGLNITKALLDGRSFFVAASLLSASGV  
VEEFEADEGGAGITLFPVPTDSAFSDLSETDVSLSLQSLPADKKADVLFKHLVHSYYPGLSLESIVNPVQPTLATEDMGA  
GSFTLNI SRANGSVAIDSGIVLASVTQTVFDQNPVAIFGVSKVLLPKEIFGRNPVLT SKPGNSDMGNALP PAVALSP  
ESSPKMLSSAPGVREEKS GVGGLQRFSTLPLLCALVVWYCI

>Potri.008G127500-PtFLA31

MAATKILLSLFFLSFSLFSSSIPTETLREAAVILSNNGYLSMSLTLPLVSNLIPHPTPSLTIFSPSDTAFTQSGQP  
PLSILRLHFSPLSFPLNSLESLSLGAIPSLFPNYSLTITSTGDDVSLNGVKIKDSPVYDDGSLVILGVDFFFDTGF  
GVLNSKGYSVMASFLDLQLMVGFDTKALTIFAPVDEVIAFLGDLREYSSMFLKHAVPCKIMWGLDVFDDGVVLE  
TYLEGFGITVSTSGDNMLNDQASVNFPMYHNDWLVIHGLQSILKEPESEYSFLDDGDEF

>Potri.019G123200-PtFLA32

MKQQLISSFSIFLLFLHCASTFAQIPAAAPAQAPAVVVAAPPAAATPTQAAAPHGITNVTKILEKAGHFTIFIRLLRS  
TQEESHLSALNDSSTGLTIFAPTDSAFSELKSGTLNLTLDGDKSELVKFHVVPFTLSTSQFQTVSNPLGTWAGTGS



RLPLNVTSYPNSVNITTGLTNTSLSGTVYTDNQLAIYKIEKVLLPKDIFTSNAPAPAPVAPAPEKPSKAVPAVTVES  
PAASVDISSALIFTNNILVGSFGLLASAMFSL

>Potri.019G120900-PtFLA33

MKPQYLLSSFSIFLLFLHCPNTFAQSPAAAPAQAPAVVASPPAATPTQAAAPHGITNVTKILEKAGHFTIFIRLLRS  
TQDENRFLFSALNDSSTGLTIFAPTDSAFSELKSGTLNNTLSGDKSELVKFHVVPNSYLLPSSRPLSGTVYTDNQLAI  
YKIEKVLLPKDIFASNAPAPAPVASAPEKPTKAVPAVTVESPAASVDISSALIFTNHLVVGSVGLLASAMFSL

>Potri.004G210600-PtFLA34

MRQOSSLLFSLILFLHCTKTSGQSPAAAPVMPPTTPVKAPPTAPSQAPSAQVATSPGPDVVIKILQKAGHFTVF  
VRLMQATTEDTELKELNKTNNGITIFAPSDSAFNSLKAGFLNALSDEDKTELVKFHVLPALISSSQFQTVSNPVRT  
QAGTGPRVTLNVTTGNFVNITTGLTNTSISGTVYTDSDQFAIYQIDKVLFPDLIFTPKPPAPAPAPELGKPRKAAPG  
VESPTAPKDISGALTPLILHNNALLLAVSCMVAAIFS

>Potri.019G123000-PtFLA35

HIAQRHKHEATVNLIFYFLLFLQCTYTFALSPAAAPAQAPAVVVAPPAAATPTQAAAPHGITNVTKILEKAGHFTIF  
IRLLRSIQEENHLFSALNDSSTGLTIFAPTDSAFSELKSGTLNNTLSGDKSELVKFHVVIPTFLSTSQFQTVSNPLGT  
WAGTGSRLPLNVTSYPNSVNITTGLTNTSLSGTVYTDNQLAIYKIEKVLLPKEIFASNAPAPAPVAPAPEKPAKAVP  
AANVESPVAPVDISSAVWFMHNNVVGSGVIVVAVFAL

>Potri.008G128200-PtFLA36

MATQFLMSIILLSLISFPIYSILDATQILSNSGYVAMALILEFGSQTDLIPPSQSLTIFSPSDTAFSLSGQPSLDL  
LHFHFTPRFSLSLNSLKLPPGYQIPTLFSNHSLSVSSNADSQTSVNGVKINGSALYDDGFLVIFGVDNFLDPDFTVS  
GSINGSTGGIRGCYVTSGDDDCSFEEASGVLSRGSVMAFSLDLQLAKFKDHTRLTILAPVDEVVKGFMGDFSDYR  
SIFLRHVVPCKISWRDLVSLDDGVVLPYTLRGFKINVTVSSTFLMFGVQVIVPEIYSNSWLTVHGLGGSLVMQEP  
ATASNAEKIVVDFKAIKVLIASFLLLCTSQNSIL

>Potri.019G002300-PtFLA37

MGTQNLMIKSTAKILLHLLLSLLHQITTAFLTQELDFALLSLRSYGYTLFPNAISTSDLRLQLLNQSSNATSTS  
TFTLFCPPDLSLFSVDLASTAPHYTKSLFLHVSPSRLSTSDLRNLTAASGGTYIDSLVPHRLLITNSLAQLNGTVD  
GSILVNRVRSVPDLFLGSDIAVHGLDGILVAGFDEKVEDTSFEAATWSPANAIIGSAEQNSPLAGRFPARRRKRNRH  
RHNGRNGGIRRNHRGRRINGGHRRGVGRNVSGGTRGGGVTRGAFAMYNHRL

>Potri.018G097000-PtFLA38

MAPINPAISHITPTTTLYFLLLLLATTTTTTTPILAITNLTALLSSFPDFSSFTSLITSIPSLTSDLSDRSALTLLV  
IPNSYLSDDLTRRLSPSALADLLRYHILLQYLSDDLHQVPPSGALITTLFQTTGRASSNSGSVNITRNPVTNAI  
TISSPSPFSSSNATVLSLIMTLPYNVSIISVNSLLVPYGFDLMASETRPTLGLNITKALLDGHSFLVAASLLSASGV  
VQEFEADEGGAGITLFPVPTDSAFSDLSATAISLQSLPADKKADVLFKHFVLSYYPGLESIVNPVQPTLATEDMGA  
GSFTLNI SRVNGSVAIDSGIVQASVTQTVFDQNPVIFGVSKVLLPKEIFGRNPVLT SKPGNTDMGNAQPPVSALSP  
ENSPKMLSSAPGVREEIKSGVGLQWLSTLHLLCVFVVCNCI

>Potri.013G151300-PtFLA39

MKQQYSIFSFSMLLLSLCYINTFAQSPTAAPAQAPAVVVAQPPVATPTQAAAPHGITNVTKILEKAGHFTIFIRLLR  
STQEENHLFSALNDSNTGITIFAPTDSAFSELKSGTLNNTLSGDKSELVKFHVVPFSTLSTSQFQTVSNPLGTWAGTG  
SRLPLNVTSYPNSVNITTGLTNTSLSGTVYTDNQLAIYKIEKVLLPKDIFGNSNAPAPAPVQAPAEKPTKAVPSANVE  
SPVAPVDISSAVTFMHNNVVGLSVIVAAAMFACNVEGF

>Potri.013G151400-PtFLA40

MKQQYSISSISVFLFLHYTNTFAQSPAAAPAQAPAVVVAQPPAATPTQAAAPHGITNVTKILEKAGHFTIFIRLLR  
STQEENHLFSALNDSSTGVTIFAPTDSAFSELKSGTLNNTLSGDKSELVKFHVVPFSTLSTSQFQTVSNPLGTWAGTG  
SRLPLNVTSYPNSVNITTGLTNTSLSGTVYTDNQLAIYKIEKVLLPKDIFASKAPAPAPAPAREKPTKAVPAANVES  
PVAPVDISSAVTFMHNNVVGLSVIVAAAMFACHVEGF

>Potri.019G008400-PtFLA41

MINGFSTKKIQYFFNAIIVLKLDPVIDPVDPPGHGSDGLTRVNSENHSNGTYSQINSNSVLVALLDSHYTELAELV  
EKALLLQTLLEDAVGKHNITIFAPKNEALERDLDFEFQRFLLPEGNLKSQTLLLYHIVPNRINPSHNSLQHNSTLC  
RDRVKLSSQESGEKLIDSAKIIQVNAVERPDGVIHGIRKLLIPRSVQQDFNRRSLQSI SAVKPEGAPEVDPRTHRL

KKPALPAKPGSAPVLPIDAMAPGPSLAPAPAPGPGGPHHFNGEKQVKDFIETLLLYGGYNEMADILVNLTSLATE  
MGRLVSEGYVLTVLAPNDEAMAKLTTDQLSEPGAPEQIIYGLNIEASKPKKN

>Potri.017G111600-PtFLA42

MSTMLLFLLILLISSVLAASNPFSNAMEILSTSGYLSMALTLEITSKRLHLESSAATIFAPLDIAFARLGQLSVL  
DLQYHISPVRLSGGYLDLSPFGTRIP TLLPNHSLIVTTSLSYFDGKLSINGISIEESALVDFGSLIIFGMSEFFNSS  
LEISPNTLPAPAPSPSPVTSLGNTSQNESTGLDVDFGQASHLLMPRGYSIMGTFLDAQLFGIKNQTRLTIFAPVDQ  
AMDAYAKNVSDYSSIFRKHVVPGLFPRQDLEGFNDGTSLPTFSGGFMINLTKSGDVLVLNGVVPVIFPDYQSDWLI  
HGLNQLLTPPLKEEELVGESFSELDGAEDKPDVLDVDFDDYVYGAP

>Potri.019G122800-PtFLA43

MKPQYLLSSFSIFLLFLHCPNTFAQSQAAAPAQAPAVVASPPAATLTQAAAPHGITNVTKILEKAGHFTIFIRLLRS  
TQEENHLFSALNDS SPGLTIFAPTDSAFSELKSGTLNLTSDGDKSQLVKFHVVP TFLSTS QFQT VVGYHLTSQSYTN  
SVNITTGLTNTSLSGTVYTDNQLAIYKIEKVLLPKDIFASNAPAPAPVAPAPEKPTKAVPAVTVESPAASVDISSAL  
IFTHNLVVGSVGLLASAMFSL

>Potri.005G079500-PtFLA44

MESSPKLSILLILSLYIIISSTSIDGVETTTFFSSNLSPQSPQPQISTSDHFHDHFS SHTNLLAPILSHLGFTQLAM  
AVPSLPADSTTTAWSGPSTLFA PSDSSLRTRCFSCSIPDLLHEHIVPGLFSIDYLRKLAFGTKIETLSPGRCITVTST  
SLKNDSATPSTVKVFIGGVEITHPDLFNNGVLI IHGIQGYIAPLSPFSCDFERLSSLSFPFQEGVTPHVTSTTHQQG  
IGTLVQPAIMRLMLRDAMLRLRSNGFTILSLAMRVKYPELTNLVNMTVFALDDVSI FSGSHGYISSVRFHIVPNHYL  
STADLERLPVGATLPTLERGQALVVT SAGGLTGFN TAVPMRINYVRVKVPDVMRNLKIVVHAVYLPFPRIHPTSA  
FDEM MGIGGEGQNI VAAEDGACSAVFEEDGSCGTVPMPAQVKPSVVVRSDEDDHGL

>Potri.019G121100-PtFLA45

MKQQSISFFIFLLFLQCTYTFAQSPAAPAQAPAVVVAQPPAATPTQAAAPHGITNVTKILEKAGHFTIFIRLLRST  
QEENHLFSALNDSSTGLTIFAPTDSAFSELKSGTLNLTSDGDKSELVKFHVIP TFLSTS QFQTVSNPLGTWAGTGS  
LPLNVTSYPNVSVNITTGLTNTSLSGTVYTDNQLAIYKIEKVLLPKDIFASNAPAPAPVAPAPEKPAKAVPAANVES  
VAPVDISSAVWFMHNNVAGSVGIVAAVAFAL

>Potri.009G012100-PtFLA46

MYFFYSVQYRPRLCPRMQPFILLFWLLFLHACSQTFCQSPAQSPAATQTKAPVPPPP PAGPTDTIQILLKAGRFLSF  
VRLMKATHVD TQLFSQLNSSTDGITMFA PNDNAFSSLVAGAVGSLNDREKLEFVQFHILPRFLSISDFQTLNPNVKT  
LAGSDRKFP LTTITSDNSVTVSSGLTKT S ISNTIYTDKQVAIYEVDKVLV PKDLFP PAPPAPAPARPLAEPDPVAPR  
DASSALVIAWQHRVNVVLF GAGLYIAALVMDP

>Potri.013G151500-PtFLA47

MKQQHSLSSFSFFLLLLHCANTFAQSPAATPAQAPAAVVAQPPAATPTQAAAPHGITNVTKILEKAGHFTIFIRLLR  
STQEENHLFSALNDS SSGVTIFAPTDSAFSELKSGTLNLTSDGDKSELVKFHVVP TFLSTS QFQTVSNPLGTWAGT  
SRLPLNVTSYPNVSVNITTGLTNTSLSGTVYTDNQLAIYKIEKVLLPKDIFASKAPAPAPVAPAPAKPTKAVPAATVE  
SPVAPVDISSALMFHNNVVG SVGIVAAAMFAL

>Potri.015G013300-PtFLA48

MKQLISFSFSLVLLFLHCTQTLSPPPNAAPAKAPAAATVPPPAATSAQASPPVMVPVQVSKGPVNVIKILQKAGHFA  
FFTRLIKSTQEDIQLFSQLNDSRDGVTVFAPTDGAFSAIKSGVLNLTLDHQKIELVQFHII PRILTTANFQTVSNP  
ITTLAGSGNRFALNVIT TENMVNVTTGLTNTSVSAIVYTDSQLAIYQVDKVLPLDIFAPKPLAPAPAPPKPKKDDG  
AESPMVPEDTSGSVICMVHNTLLMFGVGLVAAAIPL

>Potri.019G121300-PtFLA49

MKQQLISSFSIFLLFLHCASTFAQIPAAAPAQAPAVVVAQPPAATPTQAAAPHGITNVTKILEKAGHFTIFIRLLRS  
TQEESHLSALNDSSTGLTIFAPTDSAFSELKSGTLNLTLDGDKSELVKFHVVP TFLSTS QFQTVSNPLGTWAGTGS  
RLPLNVTSYPNVSVNITTGLTNTSLSGTVYTDNQLAIYKIEKVLLPKDIFTSNAPAPAPVAPAPEKPSKAVPAVTVES  
PAASVDISSALIFTNNILVGSFGLLASAMFSL

>Potri.019G123100-PtFLA50

MKPQYLLSSFSIFLLFLHCTNTFAQSPAAPAQAPAVVVAQPPAATPTQAAAPHGITNVTKILEKAGHFTIFIRLLRS  
TQEENHLFSALNDSSTGLTIFAPTDSAFSELKSGTLNLTSDGDKSELVKFHVVP TFLSTS QFQTVSNPLGTWAGTGS

RLPLNVTSYPNSVNITTGLTNTSLSGTVYTDNQLAIYKIEKVLLPKYIFASNAPAPAPVAAAPEKPTKAVPAATVES  
PAASVDISSSLIFTHNLLVGSVGLLASAMFSL

>Potri.011G117800-PtPAG1

MESQGSLLCLLWALLACYLFSFSVA YNSFYVGGNDGWVINPSESYNHWAERNRFQVNDLSLVFKYKNGSDSVLRVTKDD  
YNSCNTKKPLKTMDSGSSVFQFDKSGPFFFISGNEDNCRKGQKLIVAVLAVRTKQTPTPAYPPATSPKAPSPGHNH  
AQAPSRSSAPIAKPPTSSHVPSVSPVSPSPIANAPSSNAPTGAPGSPVTKTPQISPVPSKSPSPSPYAKPPAPAHS  
PESLTGSPPGSPVPLKSPSPLANTPSPSYHPVASPTPARSPSPSSPTPAKPPSSSTPSPTPESSSGPSLSPRSNEAD  
LAPAPAPAASWAATPSTTMVIVASLLISSAISGW

>Potri.006G067300-PtPAG2

MAWAFGKKNHKEWLPPI SYATI QALYSKHSARSTTRKNRIHLNRKNRLS MARGLNMAFLAAIAIAALVQTSVA QTTH  
TVGDTTGWAIPTGDPAFYSSWAANQTFNVGEILVFNFMANAHDAKVTKADYDACTTSSPISLVETSPARINLDASG  
EHYFICNFTGHCSAGQKMMINVAASSSPSPAPQTS SPAPQPSTPTPTQTS SPAPQPSTPTPTQPSPSPQSTPAPQPS  
TPAPQPSTPAPQPSTPTPASGSPSPAPTASGSPSPPTATPPTPAPASGSPSPPTATPSTVAPPNSARSLGFAG  
FTTFLSIFVVFLCY

>Potri.018G129200-PtPAG3

MARGLDMFLAAIAVAALIHGSAAQSTHTVGDTTGWAIPTGSAFYSTWAASQNFVDDILVFNFAANTHDVAKVTK  
ADYDACTTTSPISLFATPQVRITINASGEHYFLCNFTGHCSGGQKLMINVAASSSPSPSPAPQTS SPTPQPSTPAP  
QPSTPAPQPSTPTPQSSPAPQPSTPTPASSPTPASSSPSPPTPASSP SPPPTTPSSSPSPPTTTPTPT SPPPPNSAT  
SLGLAGFTTFLSIFVALCY

>Potri.018G129400-PtPAG4

MGSTLVAFVVLGAASLLHSSKA AVYEVGDSTGWQAPS DTSFYSNWASGKFTTVGDTLTFTTSTTVHDVATVSKSDY  
DNCNTASQSNVLTVGPATITLNATGNQYYFCTLSNHCTRGQKLAITVAASSTPSPPGTPPTTPSS SPPPPSSSTPSP  
PPPPSASSLVATFALVFMSIAISFMYF

>Potri.001G398800-PtPAG5

MESRRCLCLLWALLACYSTSSA AYNNFSDVGGKDGWVTNPSESYNHWAERNRFQVNDLSLVFKYKNGSDSVLLVTKD  
DYNCKTKKPLKTMGSGSSVFQFDKSGPYFFISGNEDNCRKGQKMTVVVLSVKPKQAPTQVSPQPPAMSPKAPSPVAY  
NNPSPAPSKSPSPSAEPPASSQGPSLSPI SPAPISKTPSGSPLEAPGPSLVVKSSPPSADTPTLAPSPTSNAPTGP  
VPAKSPSLSVSSPYLAPSPFSDAPTGAPGSPVAMTPHISLVPSGSPASAPGSEI SPSPLTNPPAPSQSPESPSPLA  
SAPVVSPIPAKSPSSSTPTPKSSYTPAHSPNSGADLAPAPAASCVATPSTVMVIVASFLIGSVIGVWP

>Potri.017G011200-PtPAG6

MGSKRFSGLFVMLVLGFLGVSRCYKFYVGGKDGWATNP SERYSHWAERNRFQVNDTLFFKYKKGSDSVLIVSKDD  
YNSCNTKNPIKSLTDGDSSTFIFDRSGPFFFISGNADDCNKGKLIIVMAVRPKPLPPTPYSPITPASSPQPTSSPP  
AVSPDARSPSDSAGPAQAPSTNSKSGSSGLTAGSLVGLVLGASIGVSFILGGFLRV

>Potri.017G012300-PtPAG7

MGSKRFSGLFVMLVLGFLGVSRCYKFYVGGKDGWATNP SERYSHWAERNRFQVNDTLFFKYKKGSDSVLIVSKDD  
YNSCNTKNPIKSLTDGDSSTFIFDRSGPFFFISGNADDCNKGKLIIVMAVRPKPLPPTPYSPITPASSPQPTSSPP  
AVSPDARSPSDSAGPAQAPSTNSKSGSSGLTAGSLVGLVLGASIGVSFILGGFLRV

>Potri.011G135400-PtPAG8

MAYTTCKDNV FHLGLL CFFLLLIQKNNAYFPVGGPKGWTVPDNTSSKSYFNDWAEHHRFQRGDSILFVYDASQDSV  
VQVTKEGYENCTAEKPLATFNDGHTVFKFNQSGPHYFISGNRDHCQKNEKLAVVVLADRSTNATASPPSPGSSDMVP  
APTPSSEESPPAGTVDINPTPPTGAPPNSASSMFVSFFGSMGAFFASSLILAI

>Potri.018G018200-PtPAG9

MASFQRAAVFSLVLMSSLWGSSQAKDLLVGGKTDWKIPSSSESDSLNKWAGKARFLIGDSLWVKYDGQKDSVLQVTK  
EAYAACNTTNP IEEYKDGNTKVKL DKS GPFFYFISGAEGHCEKGQKIVVVVLSQKHKQVGYVGS PAPS PVEFV GPAVA  
RTSSASNLKGLLVALGVLVGLF

>Potri.001G192100-PtPAG10

MFNIGVTFGFAMMVLFRSVAQTVYVVGDNNGWTVPQAGAQAAYITWASGKNFMVGDTLTFNFTTNHNDVLRVQKESF  
DACTSSNSIGDVIISTGPNITLDSTGEHYIYICTIGRHCQFGQKLAITVSSRRTTGASPPSTTPRPPPPRSPATTPSPS  
SNNTSDGCAPTAPSPSTSSMIPESLPTIPSPPGSSSSNVLASFMMTMLAAIVGLVF

>Potri.006G067400-PtPAG11

MRSILVFFVVLGAVSLLLRGSEAVDHEVGDSTTGWKSPSSTSFYSDWASGKTFALGDTLKFFTTTGAHDVATVSKSDYD  
NCNTGSQNNLLTTGPAITITLNVTDGMYFLCTIAGHCSAGQKLAITVAAGNTTSPGTSPPPPAAASSLVATFALMFVS  
IAISLMYCF

>Potri.003G047300-PtPAG12

MAKIAVALFMMALCGVCFGAGYNVGESDGWTIGVDYNQWASTKKFQVGDTLVFNYNTMFHNVLQVTKQDYESCNVK  
SPVATFASGRDFITLDKAGHSYFVCGFPGHCQAGLKVAISVRASSSQSPDVSPSPSTPREIPPPPPQTLAPGQPN  
FHPPPLGSPNVPLPPGFPNFGTPSGPGFPYLPFFESGASLHSSNLKAAMLSVIMTNLFAVFAY

>Potri.014G049600-PtPAG13

MANIASALLILVLAAPAAYAATTYTVGDSSGWSTTFGDYTTWVSGKTFTVGDSLLFKYSSTHTVAEVSKGDYDSCST  
SNLGKTYTDGSSSTVPLSTAGPMYFICPTSGHCSGGMKLAITVVAASGTPSTPTTPVDDGSTTPPTTSGSPPTTPST  
TVAPPPPSKSNNGATSILYNMMLGVFLVFGTTVALMGQ

>Potri.001G419200-PtPAG14

MANISYQNKVHFVHLGLLFLLLIQKNNAFQYQVGGGSKGWTVPDNTSSSSKSYNDWAERTRFRIGDSLLFAYDPSQ  
DSVLQVSKGDYENCTTKNPIAASFDPKTVFTFNHSGHHYFISGNKDNCLKNEKLVVVVLADRSSNHSANTNQTTAAP  
SPSLGYSDMVPAPTSPGVEPPPAPAGIADINPTPAPAGVSPNSASSLFFVFIGSMGAFFASSLILSF

>Potri.006G184100-PtPAG15

MASHKVALLSILVVSFLVTFTEARDIMVGGKNYSWKIPSSSEDSLKNWAEASRFRVGDTLVWVYDPPKDSVLQVIK  
KDYETCNTSSPLVYKDGNTKVKLDRSGPYYFISGADGHCEQGQKLIITVVMMSMRSHFMGISPAPSPVEFGGPAVAPT  
STGGVNLRGSLGLSFGVLTGLILL

>Potri.006G264600-PtPAG16

MACFQRAVACALVLMFLVGLSQAADLLVGGKTDANKIPSSSEDSLKNWAEKARFLVGDLSLAWKYDGQKDSVLQVTK  
EAYASCNTTSPIEEYKDGNTKVKLDRSGPYYFISGAEGHCEKQKQFVVLVLSQKHRHTGISPAPSPAEFEGGPAVAP  
TSSAYTLRGGFLVAFGVLVGLILM

>Potri.013G061300-PtPAG17

MASRCVLAIFVLIAAIVPMTTLATEYIVGDESGWTLGFYHAWAAGKNFLVGDDELVFKYPVGAHNVFKVNGTEFQNC  
IIPADRALTSGDDTIVLASPGKKWYICGVGKHCEFGQKLAITVQSLAPTSPAPSPLYAKPDEAVKGRPFFTLRW  
W

>Potri.002G161300-PtPAG18

MANFRKTIILVVSFLTTALCGVSMATVYQVGDSDAGWTSMGQVDYQDWAANKNFHVGDTLVFNYNNQFHNVKQVTHQGF  
ESCNATSPATYTNNGSDTIVTLEKLGHFYFICGYPGHCQAGQKIDILVAPATSNLGPAPLSQISPPSSASTLSFSNLSW  
ASGVLLASCLLGFY

>Potri.001G268700-PtPAG19

MANFRKTIILVVSFLTTALCGVSMATVYQVGDSDAGWTSMGQVDYQDWAASKNFHGGDTLVFNYNNQFHNVKQVTHQGF  
ESCNATSPLATYTNNGSDTIVTLGKQLGHFYFICGYPGHCQAGQKIDILVAPATSNLSPAASSPSSASSPYFSNLSWTLG  
VLGFCLLGFAY

>Potri.002G052500-PtPAG20

MGSMMKTLAISCFMMALHGVSMASTVYQVGDSDAGWTSMGQVDYQDWAADKNFHAGDTLVFNYNIQFHNVKQVTSQDF  
ETCNATFPIATYTSGSDAINLERLGHVYFICGFRGHCLAGQKIDILIAPVTSGPSAPHWPLSSRSSASSDLYFNKLY  
WTLVSVLVLCLSQFAY

>Potri.001G080700-PtPAG21

MAKLVLVYSLVVLGLALTCNAATYMVGDNSGWDISTDLDTWAQSKTFVVGDLLSFQYSSSSHSLEEVKKEFDSCNTT  
NVARTFTNGNTTVPLTEPGTRYFVCGNQLHCLGGMKLVNVEDNQANPPIGAPQAQPAAGGTLTQPSSKSNNPASVIP  
TSAGSVYGGRDICIVMAFLGFVATMFWVVRV

>Potri.003G150300-PtPAG22

MGKLVLVFSLVVLGLAVTCKAATYMVGDNSGWDISTDIDTWAQDKTFVAVGDVLMFYQYSSSSHSVDEVKKEFDSCNTT  
NVLRTFTTGNNTVSLTNPGRYFVCGNKLHCLGGMKLVNVAASNQADSPGTGAPQTHPGGNISQPSSKSNNPASVIPT  
SAGSVYGGRDSIVMAFLGFMATLSWAVQV

>Potri.002G101300-PtPAG23

MAGLISRSVPCAILVVLCTVVPILAKDHTVGDSSGWAIGMDYSTWTSGKTFVVGDSL VFNYGGGHTVDEVSASDYST  
CTTGNAITSDSSGATTIALKTAGTHYFICGVPGHCGSGMKVAVTVAAAGSSTSPSSSGTPSSDSTTTSPAGSNVTNY  
KPSSNNVPDSSLGINISPFVAIAGTCVAVFVMVF

>Potri.013G030000-PtPAG24

MASCRIFMIIAIVAVFVPSILATEHMGVGDGKKGWTLGFNYQTWAQGKAFYVGDTLVFKYTPGAHNVL SVNGTGFECK  
AADDIVPLTTGNDVITLSTPGKKWYICSVPGHCESGNQKLFITVLPQLSPATSPFPGPDTDTSPSGAAGNIASYYG  
LIAAIVGIFGMIMF

>Potri.013G030200-PtPAG25

MASCRIFMIIAIVAVFVPSILATEHMGVGDGKKGWTLGFNYQTWAQGKAFYVGDTLVFKYTPGAHNVL SVNGTGFECK  
AADDIVPLTTGNDVITLSTPGKKWYICSVPGHCESGNQKLFITVLPQLSPATSPFPGPDTDTSPSGAAGNIASYYG  
LIAAIVGIFGMIMF

>Potri.019G037800-PtPAG26

MASYQLIALALVTIFLPTLTMAAEHIVGDEQGWTVNFNYTTWASGKVFHVGDTLVFNYPKPPHNLFKVDGAGFKDCAA  
SGEPMASGNDIITLSSPGKKWYICGYGKHCELGQKLVINVEAETPAPTPEPNAAYGLAASCYQIFAAAVAVVAMIA  
A

>Potri.T070900-PtPAG27

MASYQLIALALVTIFLPTLTMAAEHIVGDEQGWTVNFNYTTWASGKVFHVGDTLVFNYPKPPHNLFKVDGAGFKDCAA  
SGEPMASGNDIITLSSPGKKWYICGYGKHCELGQKLVINVEAETPAPTPEPNAAYGLAASCYQIFAAAVAVVAMIA  
A

>Potri.007G120200-PtPAG28

MVRTFTSLALMAMMLRLAMAANYTVGGPNGGWDATTNLQAWAASNQFLVGDNLIFQYGLVHDVNEVSKADYDSCQIT  
SPLKSYSGGTTVIPLSSPGKRYFTCATPGHCAGGMKLEIDTLATSTPPPASPLTPPPASPLTPPPASPLSPPTTS  
TLPPASTDIPASSPPEIFNLSQSPEMTPTMSPSAPRTSPLTSPTPSPATAPSIDGFMKTPLASSASKESLQRS  
LTMGISLVIMMILLAI

>Potri.002G101200-PtPAG29

MEYGLSHLHEISPFHILRALWNQVDLIILTPYLLIPLYNTPNDDPKSNPNTFFSLLFSRKMAGLISRSVPCAILV  
LCTVVPILAKDHTVGDSSGWAIGMDYSTWTSGKTFVVGDSL VFNYGGGHTVDEVRASDYSTCTTGNAITSDSSGATT  
IALKTAGTHYFICGVPGHCGSGMKVAVTVAAAGSSTSPSSSGTPSSDSTTTSPAGSNVTNYKPSSNNVPDSSLGINIS  
PFVALAGTFVAVFVVVFS

>Potri.003G117900-PtPAG30

MASPNKMFMIIAIVAVSVPSILATEHLVGDATGWKPGFDYGAWANGKEFHVGDTLVFKYRAGAHNVL RVNGTGFECK  
KAADDIVPLSSGNDVLSLSTPGKKWYICGFAEHCEGNQKLAITVLAQLGSPSTSPSPSPTGTSPSGATSGSTVSRY  
YGLIVAIVGMVMF

>Potri.001G332200-PtPAG31

MEYRVCLVLVVALITKEAMAQHVVGGSQGWEEESTDFSSWASGQKFKVGDQLVFKYTSGLHSVVELGGESAYKSCG  
LGTALNSMNTGNDVVKLNKPGTRYFACGTLGHCGQGMKVKITVESGTPAPSTPESPPSSSSSPAASSASAMHSYFATFV  
LLTALVATSLLYMF

>Potri.008G151000-PtPAG32

MALVKRALALLMSITLAMELIHA AVYKVGDSAGWTTIGNFDYKKWSATKTFQVHDIILFKYNAQFHNVMRVTHAMYK  
ACNTSAPLATYTTGNDSITIKTRGHHFFFCGVP GHQCQAGQKVDINVLQSNEMAPTSSVSSSESPPVPSAKVPGPAP  
SNAMPLKALKSPSGNIGLAMAVLATFWINFA

>Potri.017G088500-PtPAG33

MENSGRTTIGKTVLSMAITAVTMMIVECAAAEQLYKVGSRGWI PNYNITDNLNQSHEHFYVGDWLLFVFDKHSYNV  
LEVNETSYENCNDQGF IKNITRGGRDVVQLTEARRYYFLSSGGYCWNGMKVA INVEDFAPTAPASSTENGSPSNIV  
SRQMIILIAFCVALEWMLFL

>Potri.015G114300-PtPAG34

LFLAVIFTSRLYSVYSFEYQIGGNENWVPPA IDTRIYVDWALGNRFQVGD TAREKDSVMKVRVEDYMKCHSRHPN  
FFSSTVYHLNYPASSYFISGVSGHCEKQRMII IKAVEDRFLAIDLAGNGHGVV

>Potri.010G243600-PtPAG35

MALQRHPCIAILFAQAIATFDATSGLR YTVGGSIWSIPHPDFYCNWSSSHTFYIGDVLVDFEYEFFNVIQVPKL  
DYESCTALNP IRILTRSPALAILIHEGVNYYICNISNYCDLGLRFSVVVHKFYYSTGHSPAPSPLPSLPPSSPPTLS  
PYPAPGPSQAGWTDVSPQSPVNNSPIAPNAGRRLKGLRANSQVTVVGLACALCLGTLFVLL

>Potri.001G187700-PtPAG36

MKITKMASLAVLFCCTCFVIATGLGNAEKVFKVGFDEFWQEPGQNSSAVY TQWATRNR FQVGDLSLFEYNNDSVIEVD  
KWGYHCDGSKPIVAFNNGHGVFKLDRP GPFYFISGTPNHCMGGQRLLEVMGLHHHSPLTATPPAGQLAPSPQSS  
GVFVSVTLGSLSTLLMGTIALLWCLP

>Potri.003G050500-PtPAG37

MTSLVVFFCICFIITVASMNGLVIAERVFKVGDVFGWQEPGQNSSSLYAQWATRNR FQVGDLSLFDYKND SVIEVKN  
WGYHCDASKHIVAFNNGNRVFKLDKSGLFYYISGTPSHCKNGQRLLEVMGLHHHSPPFIAAPPGYLAPSPQLSSG  
VSVSGTLGSLSMALMATLIALLWSLA

>Potri.010G089900-PtPAG38

MALVMRAVALLTVMTLMLELIHA AVYKVGDSAGWTASGNIDYKQWSATKTFQVGDVILFEYNAQFHNVMRVTHAMYK  
ACNTSAPMATYTTGNDSITIKTRRHFFFCGVP GHQCQAGQKVDINVLRS DERAQTPASSSMSPPVPSAKVAGPASS  
NALS LKALRSPFGSFLAMAVLATFFYINLA

>Potri.013G054500-PtPAG39

MASSQFI AFALVTIILPTLTMAAEHIVGDDKGWTVNFNYTTWASGKVFHVGD TLVFKYQPPHNLKVDGNGFKNCVA  
SGEALTS GNDIITLGSTGKKWYICGFGKHCSELGQKLVINVEAEAPAPTPIPNAAYGLAASGYQIIVA AVAVVAGMI  
VA

>Potri.002G092800-PtAGP57I

MKTALFITCILATLAVLANS AQNGSPPKSPAPAPSVDCSDVAVDMLDCV TYLSDGNAEKPTDSCCAGFEAVLSLDDE  
CLCFALKHSADFGVAVNLTRAAALSSECGV SAPPLSRCGKPAAPSPVIEPPTNDQPSAPAPAPSNSDDNGRSAAAPV  
TSDVPAQAPAKGKACAVSAPSLVLISSAVASALSFLWI

>Potri.003G020200-PtAGP58I

MASKKVLSLILLCTISVSCCIWAEGASHRHASAPAPSVDC TTLVLSMADCLSFVSN DSTSKKPEGTCCSGLKTVLGT  
DAECLCEAFKSSAQFGVVLNVTKALALPSACKIKAPPA SNCGLTTPSPAGAPAGSAAAGPSVNGVSNELAPAPSPGS  
SGSNGLFVSAGSLIVGLVVASFSF

>Potri.006G261800-PtAGP59I

MASPETLAPLILAIICSI VSSCESNFPSVLFP SYSHPTPPSSYPAYPPP DNNEPVSPPSPPAYFLPEPVTPSYPAV  
ATPSYPPQTAHPMKPAPSPSAVPAYPGVPASSPPLPTPAASPVSYPPVPAPPEPYPSPPDHKGIGKAYWPSFDGFEA  
SSIDTSYFTHIFYAFLLPDPVTFKLNVT PFDQOKIPGFIQNL RTRNPPVKTL LSMGGGSDAIALIFANLSGAQETR  
KVFIDSTIEVARTYGF DGLDL DWEY PANDQEMINLALLVKEWHEALVHEASASGKPRLLLLTA AVYYSSQFTTFFGLPR  
SYPADSINKYVDWINPMC YDYHGTWENFTGPNAALYDPKSNVSTSF GIGSWIQAGVSPKKLV MGLPLYGRTWKLLDP

NVNGIGARAVGKGPEDGILDYYQVLEFNKENNAIVNFDGQTVSYYSYAGGFVWGYDDSIITIDWKVQFARSRGLGGYF  
FWALGQDKDWIISKQASNSWDR

>Potri.005G167500-PtAGP60I

MKRSLFIGCILATLALLANS~~AHHESSPRKSPAPSP~~SADCTDVAFDMLDCITYLSDGSEAAKPTASCCAGFEAVLSLD  
AECLCFALKHSADFGVALNLTRAAALSSKCGVSAPPLSKCGISV~~PATGAPANPPSSVPEPAPPTESPYPVIEPATN~~  
NQPS~~APAPAPSNSDDNGVSAAPVIEVPAQAPAKGMAYSISAPF~~SVLISCAVAST~~PLFLWV~~

>Potri.001G210100-PtAGP61I

MASRKVLSLILLCTFSISCCSQSPASAPAPSSVDCANLIFSMADCLSFVSNSTAAKPEGKCCAGLKTVLSTKAECLE  
CEAFKSSARFDIVLNVTKALSLSVCKIHAPPASNCGCQLAIS~~PSGARAPAPGGSAPGLAVNGGGNEQAPAPSPGHS~~  
GSIGFISISVGLIIGFVFAFSSF

>Potri.010G085200-PtAGP62I

MERFVPISRMIPFLAVALAVMILPVYQ~~QINTACTASVLATFTPCMNFLTNSTAANGTSP~~TAGCCGALKNLTSNGMDC  
FCLIVTGSV~~PFSIPINRTLAI~~SLPRACNMPGV~~PVQCKATGSP~~I~~PAPGPVTLGPTLSPGVSPSASPEAPVVPEPTPST~~  
LPPVSDT~~TPLLTPP~~SSSTGDTG~~APTSTTTGSRPVLTPP~~~~SASAPSHSLSPSLLLFAVGFVLFKCY~~

>Potri.005G003500-PtAGP63I

MMAKVASKGLFLFFLSLLTLSSSGTFVGF~~SYNARGITSAASLGRIVSFLELNKVSASHIRVFAADHRVLSTLSNFNV~~  
SADLYLDDSLVEKLT~~TKSKPSAISWLKAQIVTFLPHVYSSIVSGNGLSKLLSALKSIH~~SVLSSFHVDNEVKVSVAF  
SLSFLENLNR~~TQEKDLRRI~~LGF~~IKRTTSFVIVETSLDMDVELGMKDLFIQSMIQK~~VAVATSL~~LSPNDAP~~I~~VMI~~IKSL  
VIPGAKEVAEFGDRVSKSLENTKIRGQVAGLYAEVSSVEDFAEKELEREHEQIFPSSRREILRNFKTTLHDDIINPP  
TVFPTNPGS~~TPPVVTL~~LPD~~TPTPTIVTVPA~~TNPVT~~VTP~~TNPV~~STPLPFPNTTPVNV~~PTNPSVNP~~PPPI~~TNPVT~~TPA~~  
PITVPGAQPV~~SPVTTYPAPAGNVPVTAPVTNPVAPPATTNAPAI~~PGQSWC~~VARSGVMDTALQ~~SALDYACGMGGADCS  
QIQGGNCYNPN~~SLQNHASYAFNSYYQKNPVATSCDFGGTATTVN~~VNPSTGSCIY~~PPSSSSSSSSSTPSL~~PATTTSPA  
NPATTSPANPATTSPANPTTSP~~PAIGVPGAPPSVLNSSTNPASSFGFNTPPALNSSASKSATLQPF~~IGCAILVTSFV  
ARTIILDN

>Potri.002G059600-PtAGP70I

MGGRVIYSLMFFLLGLFLSSGSVAEMLADENS~~RQADHGTKQVVVDASSISS~~TRKDIT~~TPITTVPTI~~IPT~~TPTASTP~~  
VINPNSEPDSTSPATMT~~PMVTP~~TSTAS~~SPVSPGASWC~~IASQSAS~~SPTALQ~~VALDYACGYGGADCSAIQPSGSCYNPNTL  
RDHASYAFNSYYQKNPV~~PSSCNFGGTA~~VTTSTNPSTGTCQFPSTSTSSILNTTNSNGATVYGA~~VPSNP~~TPSVAARI  
NET~~TPHFMSV~~TFLIVFLAQLTSSLC

>Potri.001G353400-PtAGP71I

MASGGAVQCFTIFLLYLFLYPGHPSVAEMP~~ILEPIQKYEVVGDENRMLISYSETAIQLDAVTGGVPI~~INPTNPGSGT  
TPV~~VNPVDS~~SPPTPIGTNP~~IPTTPPAGMVPPAGMVPPATMNPP~~PATMNPPATTNPPATTNPTSSGGAWCIA~~SPTASET~~  
ALQVAIDYACGYGGTDCSALQPGGSCYNPNTIRDHASYAFNSYYQKNPV~~PTSCVFGGTAQLTTTDPSSGNCHYASSP~~  
TTPSIS~~SPVNPAPTPTPTPTPTPTMTPTITSPGGP~~PTVYGVPEPVGQPSSATS

>Potri.011G078500-PtAGP72I

MGSGGLQYFSIFLLYLSLYSGHPSVAGTPTLESIQKHKIVGDQENRMLISHAVSTTQLDITGGV~~PVINPTTPGTT~~  
PIVNPVDS~~P~~PASTGISPIPTTPPAGINPVD~~SPPAP~~IGISPIPTTPPAGIMTPVTPNP~~PA~~STNPTSSGGQWCIASTIA  
SQTALQVAIDYACFGGADCSAIQPGSGCYNPNTLRDHASYAFNSYYQKNPGSTSCVFGGTAQLTNTDPSNGNCHYE  
SSSTTTPSTSSPVNP~~TPTMTTPATTSFPDGP~~PAVYGVAEPTGEP~~SSATSISCSLLLLYSTTAIVGFLVATKHL~~

>Potri.005G202400-PtAGP73I

MGGRVIYSLMFCLLGLFLSSSGSSVTKRSANENSERAGHGSKQVVVLVNSISGSQKDIT~~TPITTVPTI~~IPTTST~~PLI~~  
NPNSDPDSTSPATI~~TPMVTP~~STTTTPVSPGASWC~~IASPSASPTALQ~~VALDYACGYGGADCSAILP~~SGCYNPNTVHD~~  
HASYAFNSYYQKNPV~~PSSCNFGGTA~~AATTSTNPSTGTCQFPSTSTSSSVLNTTNSNGATVYGA~~VPSNP~~APSGINSLDL  
LHLSCCWLKMSISDICRWCYTDLLLLALLAS
