# Supplementary material for: Bioinformatic Identification and Analysis of Hydroxyproline-Rich Glycoproteins in Populus trichocarpa
Source: PubMed Central journal article supplement (PMC5073881; doi:10.1186/s12870-016-0912-3), 2016-10-21
Supplement: 12870_2016_912_MOESM2_ESM.pdf [file 12870_2016_912_MOESM2_ESM.pdf]

## Supplemental Figure 2

>Potri.018G050100-PtEXT1

MDLLHSVMLYFSLALLSSSEATDITFSRNSALWLTYKSPPPP FHNKHKSPPPPHKYKSPPPPHHKCKYSPPPPV  
YTYRSPPPPTPMHMKSPPPSPHMFKSPPPPPYRYISPPPPPHPPCHA YKYLSPPPPS YKYASPPPPKHHHHHKHK  
WSPYPFITYMSPPPPHHNYPD VHYSSPPPPPPIVAY

>Potri.001G019700-PtEXT2

MIYALAFCVVATSVVAKEP YYYKSPPPPLKS SPPSPSPPPPYHYSSPPPPKKSPPPPYIYKSPPPPLKSPPPPYHY  
SSPPPPKKSPPPPYHYSSPPPPKKSPPPPYVYKSPPPSPSPPPPYHYSSPPPPKKSPPPPYVYKSPPPSPSPPP  
YHYSSPPPPKKSPPPPYIYKSPPPSPSPPPPYHYSSPPPPKKSPHPPYVYKSPPPHY

>Potri.001G122100-PtEXT3

MASGALASNALLSLYLFLALLSSAEYCPSPPKVKSPPPPKAKSPPPPKVKSPPPPKVKSPPPPKVKSPPP  
PKVKSPPPPPPMVMSPPPIVKSPPPPMVMSPPPIVKSPPPMAKSPPIDNSPPPPMFKSPPPPPSLPKGTC  
RDTLKLQACANVNLKIFVGEKEKAKCCSLIDGLVDLDAVCLCTRIKVDLLGLIKLDVPVAVELLNNECDRVAE  
DFKCPS

>Potri.001G259600-PtEXT4

(MASPSRRHLVHANVFGLLA) INVAANIYDNEEPPRPPHDHEDPPLPYNHKNLSFLPSGLLHRGT P P P P P R S P P P P N  
KKKT P P P P P K K K K T Q S P P P P A K S P P P P P A K S P P L P S A S P P T S S S A P I L P P L P S K I S P V T P P S K V P P S P S P A S N L S P  
S P P Y T S P A S P P R I P P I P S P S P T P N L S P S H P Y T P P T S S P K V S P S P S P T P N L S P S H P Y T P P T S P P R I S P I P S L S L T P N L  
S P L H P Y T P P T S S P K V S R F P S P S P T P N S S P S H P Y T P P T S P P R I S P I P S P S P S P T P N L S P S H P Y T P P T S S P K V S P P P  
S P T P N L S P S H P Y T P P T S P P R I S P I P S P S P S P T P N L S P S H P Y T P P T S S P K V S P S P S P T P N L S P S H P Y T P P T S P P R I  
S P I P S P S P S P T P N L S P S H P Y T P P T F P P K I S P I P S P P Y T S P P P P P I L K S P P P P R F T L P P F F H F K S P P P P S P S P P P  
P F L K S P P P P R F T L P P L F H F K S P P P P S P S P P P I L K S P P P P R L Y M V N D G S G F L R R D L H I I

>Potri.001G020100-PtEXT5

MENRGRMGHLSPMIHAIAICLVATSVVA YEP YYYKSPPPPSQSPPPPYHYSSPPPPKKSPPPPYHYTSPPPPKKSP  
PPYHYSSPPQPKKSPPPPYHYSSPPPPKKSPPPPYHYSSPPPPKKSLPPYHYSSPPPPKKSPPPPYHYSSPPPPKK  
SPPQYHYTSPPPPKKSPPPPYHYTSPPPPKKSPPPPYHYTSPPPPKKSPPPPYHYTSPPPPKKSPPPPYHYSSPP  
PKKSPPPPYHYTSPPPPKKIEIVDPW

>Potri.001G019900-PtEXT6

MQPQKARVLK MENRGRMGHLSPMIHAIVICLVATSVVA YEP YYYKSPPPPSQSPPPPYHYSSPPPPKKSPPPPYHYT  
SPPPPKKSPPPPYHYSSPPPPKKSPPPPYHYTSPPPPKKSPPPPYHYSSPPPPKKSPPPPYHYTSPPPPKKSPPPY  
HYSSPPPPKKSPPPPYHYSSPPPPKKSPPPPYHYSSPPPPKKSPPPPYHYTSPPPPKKSPPPPYHYSSPPPPKKSP  
PPYHYTSPPPPKKSPPPPYHYSSPPPPK

>Potri.001G260200-PtEXT7

MASPSRRHLVHAMVFGLLA INVAANIYDNEEPPRPPHDHEDPPLPYNHKNLSFLPSGLLHRGT P P P P P R S P P P P N K K  
K T P P P P P K K K K T Q S P P P P A K S P P P P P A K F T L P P F F P F K S P P P P S P S P P P H I L N S P P P P R F T L P P F F P I K S P P P P S P  
S P P P P I L K S P P P P R F T F P P F F P F K S L P P P S P S P P P H I L K S P L P P W F F L P P F F F K S P P P L S P S P P S N N

>Potri.001G020000-PtEXT8

MQTQKARVLK M E S R G K M G H L S P M I H A I A I C L V A T S V V A Y E P Y Y Y K S P P P P S Q S P P P P Y H Y S S P P P P K K S P P P P Y H Y T  
S P P P P K K S P P P P Y H Y S S P P P P K K S P P P P Y H Y S S P P P P K K S P P P P Y H Y S S P P P P K K S P P P P Y H Y S Y P P P P K K S P P P P Y  
H Y T S P P P P K K S P P P P Y H Y S S P P P P K K S P P P P Y H Y S S P P P P K K S P P P P Y H Y S Y P P P P K K S P P P P Y H Y T S P P P P K K S P P  
P P Y H Y S S P P P P K K S P P P P Y H Y S S P P P P K K I E I V D P W

>Potri.010G001200-PtEXT9

M E T R H K L K L S L L A L F M L L P S T K S S T M P K S R M L Y Q I A C T M C S T C C G S T P V P S P P P P S P P P P A A S P P P P A T T A I C P P P P  
S P P P S G G G S Y Y Y S P P P P S T Y T Y S S P P P P Q G G V V G G T Y Y P P P N Y K N Y P T P P P P N I V P Y F P F Y Y Y S P P P P S M S A S F K L  
M A S Y S T S V L V G V V A L V L C L F

>Potri.010G113300-PtEXT10

MLLRMSFFNSLMLLSMFLFVAAPVHGLDSRKLDETTVPAPTEEKCTPCNPSPPPPSPPPPVLCPPPPPPPELPPPTP  
KKPPSGYCPPPPPAPSFIYVTGPPGNLYPIDNDFSAAGRPTVRKQDKEFSCPRI

>Potri.T091000-PtEXT11

MGGITYLLSFILIELLLSSHISNTGKASAWAPPSSWSSPDMISSNEISYYKLGVSRRTKPSPPPPRVNVPTHYKS  
PPRPPPPPPPPPPPPPPPPRRRRRPPPPPC

>Potri.013G045700-PtEXT12

MGGIAYLLSFILIELLLSSHISNTGKASAWAPPSSWSSPDVISSNEISYYKLGVSRRTKPSPPPPRVNVPTHYKS  
PPRPPPPPPPPPPPPPPPPRRRRRPPPPPC

>Potri.003G064900-PtEXT13

MDTKSSITSISLILGLIFTFCALLVESQSQNGPSPSPPPSPPPFPFPPPPSPPPPPPLPPPPSPPPPPPPPPPPPS  
KSPPPPPRKKLQPPPPPPRDRSTGNVMRRRSHPPPPPPPSKNHQMNSGKKIGLLFVGIAAILQIGVVGFAYKRRQ  
LLKINDRYEACSS

>Potri.006G225400-PtEXT14

MQLQEMGYLNGPLTSPRGRWFTLFFKIVIVLEMVMFARANSADMPGEPAAAGLLCISDCVTCPVICSPPPPPLLDYP  
SPPSRHSPSPQHSYHSPPPQPPPTSPPPSPPAYHSPPRSPQAPSWYPIWGTTPPPVYHFNTPNGQAPPKGLYPYP  
YYYYSSKASSFSLHASHFLLGVIVVYFLF

>Potri.002G070100-PtEXT15

MGSPMASLLATLLVATISLSLPSESTATYKYSPPPPKKSPPPPPPYHYKSPPPPPPVHSPSPGHPXXXXXXXXXX  
XXXXXXXXXXXXXXXXXXXXXXXXXXXX

>Potri.019G015900-PtEXT16

MKVSCFLLLLMMFFAMTLQDHQPSIGYKAMALVLDSPPEMGKVKIASTDHFSTEVKVGQLGRRSRRPIPSPPPPKPN  
RLVHWRWVVTTPPPMSSSPPPSPLSLSKGA

>Potri.019G015800-PtEXT17

MKVSCFLLLLMICLAMMLQEHQPSIGYKATALVLDSPPEMGKVKIASTNHSTEVKVGQLGRTSRRPIPSPPPPKPN  
RSVHWWVVTTPPPIPSPPPPSPLSSSKGA

>Potri.019G016000-PtEXT18

MKVSCFLLLLMMFFAMMLQDHQPSIGSKAMALVLDSPPEMGKVKIASTNHSTEVKVGQRGRRSRAIPSPPPPKPN  
RLGRWKWVVPVFGAPPAPTTPMPSPPPPSPLSSSKGA

>Potri.019G017300-PtEXT19

MESLHKPVTNINGHILLFLQPKMGAISSLLCFLLIHFLLLSSHSSYICRAFWEAPSRSSSDAISSNDFPNYKFR  
VWRRRIPSPPPRVNPLHFSPPPQAPPPPPY

>Potri.005G190100-PtEXT20

MRSSMASLTATLLLVAISLSLPSQTTANYEYSPPPPKKSPPSPPPYHYKSPTAPPVHSPPPXXXXXXXXXXXX  
XXXXXXXXXXXXXXXXXXXXHSLRFIIARIGLSYIVAR

>Potri.014G124700-PtEXT21

MANRMRMLLLTLSTVITINFSLSTISEVSKEQIPCTMCYSCDNPCQLPSPPPPAIPECPPPPPPSPPPPAIPEC  
PPPPAPINECPACPTPPTPFPLLLMSALRSYWPAGYSFNGPPAGYGNNPVYFPFDNNNPPPSFSFKSVHLKLSI  
VLCIFLSLTLFCFF

>Potri.T082000-PtEXT22

MPKNNKSPMNTSAVFLATTLAFVGLIAINGSQARILPDSLGLKVATLANYGRYSPPPSPIPSPRSKELTSNYEKYS  
SPPPQSPKADPSIGQVTPSYGRTTASPPPPKPAATPKAQLIIRSQCTDGCISMITNLERPISSPPSPKAPPSSQ  
ITFDLEPKVHARISPPGQNVFST

>Potri.008G129100-PtEXT23

M L L E M S F F N S F M L L S L L L F V V A P V H G L N L R K L D E T T V P G P T E E K C S P C N P S P P P P S L P P V V Y P S P P P P S P P P P S P V L  
Y P P P P P A P V L P P P T P K K P P S G Y N C P P P P A P S K Y D L Y I T G P P G E L Y P V D K D V N A A S R H A V S L Q V L I G C G L I G L L V R I G  
F

>Potri.008G213600-PtEXT24

M E T R H K F K L S L L A L L M L L S S T K S S T V L P N S R M L Y Q I A C T M C S T C C G S S P V T S P P P P P P P P P S L A T T S N C P P P P S P P A  
S P G V G F Y Y S P P P P P P S T Y T Y S S P P P P Q D G V I G G T Y Y P P P N Y K N Y P T P P P P N I V P Y F P F Y Y Y I P P P P S T S A S F K L I  
A S Y T V L A G V A L N T L L V L M

>Potri.008G125400-PtEXT25

M A S C S L G R T S I Q L R L S S V L A I F V L Q L V F V N A G Q N T R M L G G R L N D L S P P P S P K P G R L R H M I P P E I P P S T R T S P P S P P P  
S H S

>Potri.001G169200-PtEXT26

M E T K S S I T P T S L I L G L I L T F Y S L L V E S Q P L N G R S S A P L M S P P P P P P P P P P P P P P P P P P P P P P P P P P S P S L P P P S L S R S S P P  
P P P P R K K L Q L P P P P R H R L T V N E N R R R R K P P P P M K N N M N A G K A I G L L F V G I A A I L Q I G V V W F L V Y K R R Q L

>Potri.001G042200-PtEXT27

M K T P M T S A I L L A A I L A F V G L I A I N G A Q A R I L P D S F G L K V A I I A A Y G R S Y S S P P P S P I P S P S S K E L T S N Y E K R S S P P P  
Q S P K I D P P I G Q V T T S N G R T T P S P P P P K P A S P E G E L K I G S P C T D G T P C N D G Y I S M I T N F E R P L P S S P P P P D P A T P I S H  
I T F D L E P K V H A R S P P G E Y A Y S S A

>Potri.T179500-PtEXT28

M P K N M K S P M T S A V F L A T A L A F V G L I A I N G A Q A R I L P D R I G L K V A T L A N Y G G T Y S P S S P S P I P S Q R S K E L T S N Y E K Y S  
S P P P Q S P K A D P S S G Q V T P S Y G R T M A S P P P P P K P A S P K A Q L E I G S Q C T D G C I S M I T N L E R P I P S S P P S P K P A P S S Q I  
T F D L E P K V H A R I S P P G Q N V F S T

>Potri.T101300-PtEXT29

M C Y V G K A T K I F I F I V T V L V I L G L V L G Y E L L R H R L H K S H K C S G D D D D C H P P Q L T F P N P T T S G P S G L T P P S A A G I Y Q F S  
P P P P T P P D S G T N L H P P P P P P T P P D I G T N L P P P P P P P L L L S P P P P A V P A V T G A P P S N N P S S T V L V T P G P V H A

>Potri.T139000-PtEXT33

M K V S C F L L L L V I C L A M M M L D H Q P S T G Y K A M A L V L D C S P E M G K V K I A S T D H F S T E V K V G Q L G R R S R R A I P S P P P P K P N  
R S V H W W V V T P P P P M P S L P P P P S P L S S S K G A

>Potri.009G108100-PtLRX1

M A E P L R V L G C F F F F S F L L S S F S N F S L A L T D A E A S S I A R R Q L L T L H E N G E L P D D F E Y E V D V K E T F A N Q R L R R A Y I G L Q  
A W K K A M Y S D P F N T T G N W V G A D V C A Y N G V F C A P A L D D S G L S V M A G V D L N G A D I A G Y L P A E L G L L T D V A L F H I N S N R F C  
G I I P K S F S K L T L M Y E F D V S N N R F V G D F P S V V L T L P S L K Y L D I R F N D F E G S L P P E L F N K D L D A L F L N D N R F T S T I P E T  
I G N S P V S V V T F A N N K F T G C I P H S I G K M T N L N E V I F M G N D L G G C F P A E I G L L G N V T V F D A S H N G F T G I L P S S F A G L K K  
V E L L D L A D N K L T G F V P E N I C R L S S L T N F T F S Y N Y F K G E A Q A C V P P S R K D T V P K Q K S A R T C Y P V V S R P V D C S K D K C S G  
G G G S N P H P K P Q P T P P T P E H K Q T P S P P K S T S T P T P S S P I P A P R T P E L P K P E P K L P L A P V E P I S P S T P E V S L P P S L S I  
S P S T P E I S S P P S S S S P S T P S S D P Y N P G P G G H D E T P P S P K S A P S P N P F N N S P V G H N E T P P S P E S A P S P D P F N N S P D G H  
N E T P L S P E S A P S P N P F N N S P D G H D E T P L S P E S A P S Q S P E S A P S P D P F N N S P D G H D E T P Q S S E S A L S P D P F N N S P D G H  
D E I P P S P E P S P D P F N N S P N G H D E T P T S P E S A Q S P D P F N N S P I G H D K T P P P S S E I S I P P S P L I S P P T S E K H I P P S S E F  
A P S P D S Y N L R P V H S P P P S S Q S L P P L V Y S L P P A H S P P P S I H F P P P P V H S P P P P P V Y S P P L P V H S P P P S V H S P P P P M H  
S P P P P P V Y S P P P P V Q S F P P P P V H S P P P P V H S P P P P V Y S P P P P V H S P P P P V Y S P P P P L V Q S P P P P V H S P P P P L H S P P P P  
P V Y S P P P P V H S P P P P V H S P P P P I Q S P P P P V H S P P P P I H S P P P P V Q S L P P P P V N S P L P P V H S P P P P V H S P T S P I H S H  
P P P V N S P P P P V Q S P P P P V F S P P P V I V S P P P P P E E D F I L P P N L G F Q Y A S P P P P T F P G Y

>Potri.004G146400-PtLRX2

M A N P L R A F G C F F F F S L L F S S F S T F S L A L T D A E A S Y I A R R Q L L T L N E N S E L P H E F E Y E V D V K I T F A N Q R L R R A Y I G L Q  
A W K K A I Y S D P F N T T G N W V G A N V C A Y N G V F C A P A L D D P S L S V V A G V D L N G A D I A G H L P A E L G L M T D V A L F H I N S N R F C  
G I I P E S F S K L T L M Y E F D V S N N R F V G D F P S V V L S W P S L K Y L D V R F N D F E G S L P P E L F N K E L D A L F L N D N R F T S T I P E T  
I G N S A V S V V T F A N N K F T G C I P H S V G K M A N L N E V I F M G N D L G G C F P A E I G L L R N V T V F D A S H N G F T G I L P P S F A G L K K  
V E L L D L A D N K L T G F V P E N I C K L P S L T N F T F S Y N Y F K G E A Q A C V P P S R K D I V L D D T S N C L S D R P K Q K S A R T C Y P V V S R





EALVDPELEKKNYVPSEMFIRIEAAAACVVRHSAAKRPRMSQVVVRALDLDLDESSDLSNGMKPGQSEIFDSRQHSQAQIR  
MFQRLAFGNQDYSSGFFDRTQSSWRSRDPGD

>Potri.009G115200-PtPERK4

MSSPEESPVSPPPPLES SPPPAASQPPPAVI SPPPTTPPPSEEI SPPPPAEV SPPPTTPPPPSDEI SPPPPPP  
EDSGSSPQPPSSSDGNK SPPPPPKKNDNGGSR SPPPPSSSSKFHN SPPPPRPLGSSDSSSNSTESSSGNGDGTNL  
VPIIAGVVVGVGVLALLLALLVFLCACRKKKKRH YDYNDHSLAPKATGGPYFNAAPPQHASNWHNESKFGEQVVNL  
PPPPGGGHGTWSTPPSHGAIMSSEMSSSYS GPHGPALPPYP SP SLALGFTKSSFSYEELAAATEGFSQAKLLGQGG  
FGYVHKGVLPNGKEIAVKSLKAGSGQGDREFQAEVEI I SRVHHRHLVSLVGYCIAGDKLLVYEFV PNSTLEFHLHG  
KGRPTMDWPTRLKIALGSAGLAYLHEDCHPRI IHRDIKAAANILLDYSFEAMVADFLAKLSSDNYTHVSTRVMGTF  
GYL APEYASSGKLTDKSDVFSFGVMLELITGRLPVDLSEMGDDSLVEWATPLCAKALEDGNYDELID PALEGNYNP  
HEVACMIACAGASVSYSAKRRPKMSQIVRALEGEVSLDEGIKPGRGFI FTSSASSDFEQ SPYSTDIRKFRRTALDGI  
DYASSEFDHTSEYGLNPSSSSSDEMTKSQRRGP

>Potri.004G153600-PtPERK5

MSSPAPPEESPL SPPSSAPPPSLKEPPPPPLES SPPSTSPPPVEVSP SPPPPPTDSTPPSDQSSP SPPPPENSDDS  
PPPPSSSKENN SPPPPPTTKDNGSNIW SPPPPSSSKSRN SPPPPRSLGQSGNS SPNNTPATSSGNGDEANLVP IIA  
GTVVGVGLLLLLLALLVFLCTCRSKKKRSPQ YNYKDHSPAPKAAGGPYYNATPLQQPVSNGHNE SKLTEQVVNLPPP  
PGGGHGAWSPALPPPPPPQVAIMSSSEMSSNYS GSHSSSGLPPSHPSLTGFTKSSFSYGELAAATAGFSQANLLGQ  
GGFGYVHKGVLPNGKEIAVKSLKTGSGQGDREFQAEVEI I SRVHHRHLVSLVGYCI EGGQRLLVYEFV PNSTLEFHL  
HGKGHPPMGWPTRLKIALGSARGLAYLHEDCHPRI IHRDIKAAANILLDYSFEAMVADFLAKLSSDNYTHVSTRIMG  
TFGYL APEYASSGKLTDKSDVFSFGVMLELITGRRPVDLSEMGDDSLVDWARPFCAKALEDGNYDELVD PALEGNY  
DLQEMACMVACAGASVSHSAKRRPKMSRIVRALEGEVSLDEGRKAGLIFSSASSSDHDQSSYSTDMRRFRRTALDSN  
DYSSEFFGHTSEYGLNPSSSSSSEEMSQMTKSRTGSQRRSP

>Potri.004G105200-PtPERK6

MASLTPSPDSPSPSP IPISTSPSPSTPDSTTNS SPPSTSQPDQITDPLPSTPSNPATPPPQ SPPPPAPPAASPPAP  
PPSPPIIPSTPPPPPPPP SPPA SPPDAPPALTPSPPTAPPASTTAPPPPPPIST SPPRASPTTPVT SPPPPQAV  
SPSPPPPANDPIPPATN SPPPPTEKPPESPPALPTVPPPPSSQSD SPPPTTNSPPPPISTLQ SPPPSIPSTSTTP  
AISPPAPPVNSSVTGSPTPPFPAI PTEKPTARATNGTDVSTNTSSTGPGGLNNGGAVTIGIVAGFVALSLLVAVWF  
AQKRKRRRGENVGTITIP SPFASSQNSDSVFLKYPY PAVLVGSPSGSDFMY SPSEAGVVNNSRQWFTYEELVQATNGF  
SAQNRLGEGGFVCYKGVLDGRDVAVKQLKIGGSQGEREFRAEVEI I SRVHHRHLVSLVGYCI SEHQRLLV YDYLP  
NDTLYHHLHGEGRPFDWATRVRVAAGAARGIAYLHEDCHPRI IHRDIKSSNILLDENFEAQVSDFLAKIALELDS  
NTHVSTRVMGTFGYMAPEYATSGKLT EKSDV YSYGVVLELITGRKPVDA SQPLGDESLVEWARPLLTDAIENEDFE  
ALADSGLEKKNYVPSEMFIRIEAAAACVVRHSAAKRPRMSQVVVRALDLDLDESSDLSNGMKPGQSEIFDSRQHSQAQIRMF  
QRLAFGSEQEYSSEFFDRTQSSWRSRDHGDSV

>Potri.006G242800-PtPERK7

MDNTSPPTIPQIAPFASPPSPVVVVLPPAIIPPVSNPTPPPLTPVL SPPBMTIPVLSPPVASTPPPVELAPPPEASTN  
PIIPVPPPTLLPEPQIPSVT SPPPLPTRPSLPQPPLSPPLPTSPSPSQPSTSWPPP SPPKPAPPAPATPTP IMPPL  
TRPSYPPAPPSLALTPPPPLPTSMVSSPPSLALTPPPPPPPPKSMVSSPPLLPLAKGSLPMSKQFHI STGLVVACA  
FGGVFLLLLVLGLLFI CCKDKRRRNHSTQEHYNTSKILAPT DNKNNAHVHSEMCKFQSGDCVITVQTKTFLP SPSTS  
NTRSRSINSPWTANALPHQGP PDVAISFSNGTCTYDELVVATNGFSDANLLGQGGFGYVHKGFFPCGKEIAVKQLKE  
GSNQGEREFQAEVEI I SRVHKKHLVSLVGYCINGSARLLVYEFVSNNTLEFHLHGTGPVLEWETRLKIAIGSAKGL  
AYLHEDCHPKI IHRDIKASNILLDHNFEAKVSDFLAKSFSASSTHISTRVVGTFGYMAPEYALSGKLTDKSDV  
YSYGVVLELITGHPPISPAESVMNESLVAWARPLLTQALEDGNFEALLDPRLGTRYNNSEMAMVACAAACVHPSS  
WIRPRMSQIVHALEGGMSAQDLNAGIFRPRNNTLYGSSISSSSST YQYKENMKSFMARGSTQDGISGNTGTTSEYG  
LNPSSSSSEASSR

>Potri.018G081300-PtPERK8

MSAPTPTSPPSNTTAPPSTTTPPPSTPPPTTPATPAAPPPT SPPPPPTPSAQPPASTPPPPPAASPPSSSPPSPPS  
SPPPPSSSPSPSS SPPPPSSTTPSTSPSSSTTPSTSPSSSTTPSTPTS SPPPTSTSTPTSGGSSGISTGV  
VVGIAIGGVAILLVSLFFICCNKRKRRRRDDEAAYYVPPPPGPKDDPYGGRQYQWQNA PPPDRVVAAMQNPPPP  
PPVASRPSPPPERVAMPPPPPPPLFMSSSGSGSNYSGTENPYPPP SPGIALGFSKSTFSYEELARATDGFTDANLL  
GQGGFGYVHRGVLPNGKEVAVKQLKAGSGQGEREFQAEVEI I SRVHKKHLVSLVGYCITGAHRLLVYEFV PNNTLEF  
HLHGKGRPTMDWPTRLKIALGSAGLAYLHEDCHPKI IHRDIKASNILLDFKFEAKVADFLAKISSDNYTHVSTRV  
MGTFGYL APEYASSGKLTDKSDVFSYGVMLLELITGRRPVDSTQSFMEDSLVDWARPLLTTRALEDGNFDTLVDQKLG

NNYDQNE MARMVACAAACVRRHSARRRPRTSQVVRAL EGDVLSL DLNEGIRPGNSRVYGSYSSDYDTSQYNEDMKKF  
RKMALGSQEYGASSEYS **GPT**SEYGLYPSGSSSEGGQNTREMEMGKMKKASKGFSGSS

>Potri.007G027000-PtPERK9

MSSTPDAPSPDSG **SPPPPPA****SPPPE**ENSTSAPPPQSDTPPPDTS **SPPPPS****SPPPPA****SPPPE**ENSTSAPPPQSDTPPPDT  
**SPPPPS****SPPPPP**PTSDSR**SPP****SPPPK**HREDA **SPPPPP**PKHREDA **SPPPPP**SSENSQPAPPDSSNNGGLTSDQIK  
IVVGVA VFGIFLIALIFICAYCSRKKRKNRHYGENPQGGSEQFS **YNY**SAQQSNWQNG**GP**PKEHVVKLSQ**SP**GAMG  
**SP**WLAQPPTPPMGNSSDDMSSINS **GP**YRPPLPPPPPNIALGFNKSTFTYDELAATGGFDQANLLGQGGFGYVHKGVL  
PNGKEIAVKSLKAGTGQGEREFQAEVDII SRVHHRHLVSLVGYCIAGGQRMVLVYEF**VP**NKLTLEHHLHGKGLPVMWEP  
TRLRIALGS AKGLAYLHEDCHPRI IHRDIKAANILIDNNFEAMVADFLAKLSSDNYTHVSTRVMGTFGYL**AP**EYAA  
SGKLTEKSDVFSYGVMLLELITGKKPVDPSAMEDSLVDWARPLTISALETGNFIELVDPMLESKYNHQEMQRMIA  
AAASIRHSARKRPKMSQIVRALEGDVLLDVLNEGTRSTGQ**SP**MFSSSSNGSSDYDTNSYNADMKRFRQVALGSQGFSG  
SEHGTSNDSREMDPSGIHRNYQ

>Potri.005G124400-PtPERK10

MSSTPDAPSPDSG **SPPPPPA****SPPPE**EN**SPPPPP**PQSD**SPPPD**AS **SPPPPP**PPTSE **SPPPPP**PKHSNA **SPPPPP**NSRS  
**L****SPPPPP**PPPPPPPPPPNSSNSGGSSDQMKIVVGVA VGVGIFLIAMIFICAYCSRKKRKNMHYYGENPQGGSEQF  
SYNS**SP**QQSNWHNGLPTEHGMKLSQ**SP**GPMPGSGW**PAP**PPPMNSSDMSSNYSGPYRPPLPPP**SP**NIALGFNKSTFTYD  
ELAAATNGFDQANLLGQGGFGYVHKGVL PNGKDIAVKSLKLGSGQGEREFQAEVDII SRVHHRHLVSLVGYCIAGGQ  
RMLVYEF**VP**NKLTLEHHLHGKGLPVMWDPTRLRIALGS AKGLAYLHEDCHPRI IHRDIKAANILIDNNFEAMVADFL  
AKLSSDNYTHVSTRVMGTFGYL**AP**EYASSGKLTDKSDVFSYGVMLLELITGKKPVDPSAMEDSLVDWARPLMITSL  
DTGNYNELVDPMLENNYHQEMQRMIAAAASIRHSARKRPKMSQVARALEGDVLLDDLNEGTPGQSSVFSGSNGS  
ADYDASSYNADMKKFRQVALNSQEFGSNELGTSSNE**SPVT****GPS**GIHRNSESNY

>Potri.008G189700-PtPERK11

MSNSVGNPPP **GPS**PSATDGEESAALVDDTATPPPNSTNVD**SP**QT**PE**PS **SPPPT**SK **SPPPPP**PP **SPPPPP**PKSNH**SP**  
**PP**SPPLVSNSTKSNSS**PP**LKI **SPPPN****SPPP**SNPPPT**PA**KKESSSS**VP****SPPPPA****AS****SPP**AGKF**VP**PPLSRDVQ**QSP**  
**PPP**AEFKP**LS****SP**PI SNV**SP**KTLDSNPNPSNSGR**VP**TDSRFH**SP****VP**GASPSDHPSSTSTDATNHN**VP**RT**TP**PAPGNES  
NEAGGKTI IAAAVGA AVTGLFLLTLIAAIFLVVKSRRKRVANASGHYMPKSF~~TL~~KT**GD****YHY**QQQQSVRLT**GP**SP  
SYHLQ**SA**PESEHGSQRGNMYNGG**GPS**DSDVIGTGKTFFSYHELMEITSGFARQNI IEGGGFCVYKGCMDGKVVAVK  
QLKAGSQGDREFKAQEVEII SRVHHRHLVSLVGYCISDNQRLLIYEF**VP**NKLTLENHLHGKELPVLDPKRLKIAIGS  
AKGLAYLHEDCHPKI IHRDIKSANILLDDAFEQAQLRLSMLDLSQNVADFLARLNDTTQTHVSTRVMGTFGYL**AP**  
EYASSGKLTDRSDVFSFGVLLLELITGRKPVDASQPLGDESLVEWARPLLIHALETGELGELVDTRLEKHYVESELF  
RMVETAAACVRHL**AP**KRPRMMQVVRALDSGGELSDLSNGVKFGQSTAYDSGQYNQEI SNFRRMALVSNGSSEFDTFS  
GDYSARDTSREQPTSGDYTSSESETRAMNRTGSYAGRRFR

>Potri.008G111600-PtPERK12

MATV**SP**SPNSPPLAVSS**SP**SNSTPPPPSTTSS**SPP**AS **SPPPT**SPSSQPNANPPNPNPSTPPPP**Q**PAPPALSNPPP  
**AT**PLTPPTTSQ**SP**PLSGS**AP**NSN**SPPPP**SATPPVS **SPPPPP**PPSSNPPSI **SPPPP**LVNPPTS **SPPPP**SSIPPPQSL  
PPPST**PP**LQS **SPPPPP**SSRPPQN **SPPPPP**PTPSQLPTNPPPP**PA**SV**SP**PRRSHPPP**AS**TPPEN**SPPPPA**SIAPLPSN  
**VP**PPM**L**TPPTATAPLPPP**VP**SYSTPPALSPPTIRL **SPPPP**SLV**SP**SPPTNNTAPNSPESSNSTGNGGIGIGGIVAI  
GAAIGIIMLILVGLALWCMRQ**RKE**ISGLNGVYVMPSSLGSS**SP**RSGSTFTKTQST**AP**LIASGSSSDCFSLPPESSGL  
GNS**GP**LFAFEELVKATNGFSSQNLGEGGFGTVYKGYLPDGRDVAVKQLKIGGGQGEREFKAQEVEII SRVHHRHLV  
LVGYCISETRLLV**YDY**VPNNTLHFHLHEVGR**PA**LWDWATRVKIAAGAARGLAYLHEDCHPRI IHRDIKSSNILLDIN  
FEAKVSDFLAKLALDTNTHVTTRVMGTFGYM**AP**EYASSGKLTDKSDVFSYGVVLELITGRKPVDASQPVGDESLV  
EWARPLLNHALENEFEFESLADPRLEKNYIESEMFOMIEAAAVCVRHSATKRPRMQVVRAFHTLANADLTNGMRVGE  
SELFNSAQQSEIIRLFRMAFGSQNYSTDF**SP**DT

>Potri.003G103800-PtFH1

MSLLSRFFYRRPPDGLLEFVDRVYVFDSCFSTDVLPDGMYQIYLHEIITELYEEFPDSSFLAFNFREREKRSQLAEI  
LCQYDVTVMYDPRQYEGCPLPLSLIQHFLRVCESWLSKGNHQNVILFHCERGSWPLLAFLASFLIFRKLHSGEKR  
TLEIVHKE**AP**KGFLQLL**SPL**NPFPSQLRYLQYVARRNIA**AP**EWPPPERALSDCVIFRAIPSF DAGNGCRPIIRIFGR  
NLHTKGGSTQMLFMSKSSALRHVCQADCDVIKIDIQCLVQGDVVLECLHLDLDSEREVMMFRVMFNTAFIRSN  
ILMLNSDNLDILWDSKERYPKGFRAEVLFGEVESIS**SP**K**AP**TTILNGEEKGLPIEAFSRVQELFSGVEWVDSDDA  
ALWLLKQLSVIDAREFSRMQNQVSSYAS**SP**VDSSEENNASSTADSSDEAFDYVSKSTAEGMKPLMSNTVES**VP**PSAE  
SNDPQDLDLPTDPLPQVSVKG**VP**PSLHQQLSVAGVGTLT**SP**CPPQPPPPPPFART**TP**PPPPPPPHPPSI SNQ**SPL**SVA  
**AP**LDPYPPPHPL**PP****SPP**RPSTTTSSNSK**SPPPPP**PPPLSNVSSGDLSTAS**VP**TSKRDI PPPPCPPPPPNFFNKDAS





MALFRRFFYRKPDRLLLEISERVYVDFCCFSTEVLEEDEYKVYLLGGIVAQLQDHFDPDASFVFNFRREGERRSQISDI  
LSQYDMTVMYDPRQYEGCPMLPLEMIHHFLRSSESWLSLEGQQNVLLMHCERGGWPVLAFLMAGLLLYRKQYTGEHK  
TLEMVYKQAPRELLHLLSPLNPQPSQLRYLQYISRRNFGSDWPPSDTPLQLDCLMLRSLPLFEGGKCRPVVRYVYGQ  
DPSK PANRTSKLLFSTSKTKKHVRLYRQEECMLVKIDIRCRVQGDVLECIHLDEDLVREEMFRVMFHTAFVQANI  
LMLVRDEIDFLWDAKQDFPKDFRAEVLVFDADAVVPNVTTVEANEDGNETESASPEEFFEVEEIFSNNVVDGHEAKGY  
GASHKVHDNMPVDVDGKEVWKEDSDLHSFEDCASDDGNHKQEGKLDSSVDAVKDIAVDDVKYKVDKVDSDFLAVKD  
ITVDDGEIKADSVVSATGTLIRKQTTEVIGDVGELKKMEDEGDRENSATKKLESQDPPVELSADAGRQKLEQLMLP  
SPRRQPTSNAKPAADSIITEQKTKHNEQEGAHGKQTKPNTIPRWVPPNRGPFNSMHVAHPPSRYNASAPPALTFCAS  
PEDSSAGGHVKISSVATGPGDIISNDFPSPTEAPPSLDPQQIALRGP PPPPLPYSNKSSFYDFQASSGGEAPPLHSQ  
IADAVSFP PPPPTSFSRQNIQMIPOHS SPPPPPPLPQLSNRQTI GMVLP PPPPPPKSGNTPAVFTTTY SPPPPP  
PLPSGASTTNHGRLGIPNPPPPPPPLSLAHTCSTPLAQSMPHTGVIPPPPPPSKPAQRAPPSQPAHGAPPPP  
PPPMRGPPLPLVLSQAPPPPPMRGPPPPPPPPPPMRGQPLPLVLSQAPPPPPPPPPGRGAPPPPPPPPPGRGAPPPP  
PPGRGPPPPPPPGARVPGPPASPRPPGSAPHPP PALGVKGAADARGLPSGRGRGFLRPSGMGTSATAPRRSSLKPLH  
WSKVTRAIQGSWEELQRHGESQIAPEFDVSELESLSFATVHKPADSGGKAGGRHKS SVGSKTDKVLHIDLRRANNT  
IMLTKVK MPLSDMMAAVLAMDESILDVDQVENLIKFCPTKEEMELLKGYTGDKENLGKCEQYFLELMKVP RVESKLR  
VFSFKIQFGSQISEFKSLNTVNSACDEVRNSLKLKEIMKKILYLGNALNQGTARGSAIGFKLDSLKLKLTDRASNN  
KMTLMHYLCKVLAAKSQALLDFHRDLVSLETASKIQLKSLAEEMQAIKGLEKVKKELAASENDGPVSEVFRKTLKE  
FISVAETEVASVTSFYAVVGRNADALALYFGEDPARC PFEQVTATLLNFVRLFRKAHEENLKQAELEKKAKEAEM  
EKARGINLTCKNME

>Potri.009G145700-PtEXT30

MARLSICLLVIFLAIVAEAAATQKPKKAKKCRDKKNYPVCFKTKNLYCPPQCPDRCYVDCATCTPVCSKPSKSP PFLP  
PPPHSL SPPPTRSTPPSL SPPPTTSTPPL SPPPTTSTPPL SPPPTTSTPPTISTPPPPPATSTPPL SPPPTDFTP  
PSSTPPPATTTTPPAQNPPPPDSSSEAPKRARCKNRNYATCYGQEYTCPSACPNQYCDRPGAVCQDPRFIGGDI  
YFHGKKDRDFCIVSDSNLHINAHF IGRRNEKLRDFTWVQSLGILFGTHKLFIGAQTATWDDSVDRSLALDGEPI  
YLPDGEEMKWKAEI SPSVTITRSSDANAVVIEAEDNFKIKAAVVPITQKDSRIHSYGIASENCF AHLDL SFKFKLS  
GDVNGVLGQTYGSNYVSRVKMGVLMPLVGLGGEKEFASSNIFATDCAVARFSGQHPSSNSSENF EFANLHCASGIDGRG  
VVCKR

>Potri.014G115700-PtEXT31

MKDSRVSLLVFGISFICLFLCIQARRHYHAQHKKHSHLHKSSTIPEPP TTPPEPAS SPPPE PAS SPPPE PAS SPPPE PAS  
PPEEPAS SPPPEVPASPSPEPAS SPPPEVPAS SPPPEVPA SPPPELPANPSGGSGNSTGVFDVRSFGAIGDITDDTDAFKMAW  
DAACNQDDSAVILVPYGFEFMIQSTIFTGPCQGGLVFQVDGTLMPDPGPE SWPQKNSRRQWL VFYRINEMSLGGGV  
IDGRGEKWWDLPCKPHKINGTTPMPGPCDSPAIARFMSNLTVQGLKIKNSPQFNFRFDNCKNVHVESIHITAPAL  
SPNTDGIHIENTNGVEIYNSVINSNGDDCVSIGSGCYDVIDRINITCGPSHGISIGSLGNHNSRACVSNITVRDSVIRV  
SDNGVRIKTWQGGSGAVSGITFSNIHMDNVRNPIIIDQFYCLSKGCTNQTSALSVDILYENIKGTYNIRSP PMHFA  
CSDSVPCTNLTLSDVELLPAEGDLVLDPYCWNAYGNFRTLTIPVVSCLMEGIPRSNLNNEMDYC

>Potri.011G066900-PtEXT32

MESQKQQLTLFIFLLLAPLACLSSGLPGEYSTVSNLDLHEGLTEEGITEVFKLWKEKHQKVYKHAEEAERRIGNFKRN  
LKYIIEKNGKRKSGLEHKVGLNKFADLSNEEFREMYLSKVKKPITIEEKRKHRLQTCDAPSSLDWRNKGVVTVAVKD  
QGDCGSCWSFSTTGAIEAINAVTGDLSLSEQELVDCDTTNNYCGEGDMSAFQWVIGNGGIDTEAD YPYTGVDG  
TCNTAKEEKKVVSIEGYVDVDPDSALLCATVQPIISVGMDGSALDFQLYTGGIYDGDSCGDPNDIDHAILIVGYGS  
ENDEYWIWKNWSWTEWMEG YFYIRRNTSKPYGVCAINADASYPTKVPSPSP SPPPPSPPPPP SPPPPCPQP  
SDCGDSSFCPSDETCCCILKLFSSCIYGCCPYENAVCCAESTYCCPSDYPICD VDDGLCLRGQGDHLGVAARRRH  
ANYKFPWTKFEEIKETKQPVLQWKRSLRCNALNYME

>Potri.004G024500-PtAEH1

MNSLKFYVILLSLTLAITLAQEDADANYLNHFQCNATTSTINSTYRVNLNLLSSLASNATRNNNGFYNTSFGQ  
NTDQVYGLFICRGDVSNTVCQNCVTFATKDIVQRCPIGIASIVYYDACILRYSNRNIFSKVDQSPGFLLNTQNITT  
EPQRFNNLVGA AVNDLAARAAS APPGAKKFAVNKTSFNAFQNIYSLAQCTPDLSSSDCNRCLSAAIAGLPNCCSSKI  
GGRVLFPSCYIHYEITEFYDATAVAAS SPPPPP PPVVIP SPPPPQKGSVSTVLI IAIVIP IAVSIALFCMCFCLRR  
ARKTRDYVPENDVGDEITTEESLQFDLSTIEAATNNCSPDNKLGEGGFGEVYKGTLPNGQQIAVKRLSRNSGQAAE  
FKNEVVLVAKLQHRNLVRLQGFCLEREKILVYEFVSNKSLDYFLDFPERQGLLDWSRRYKIIGGIARGILYLHEDS  
RLRIIHRDLKASNILLDGMNPKISDFGLARIFVVDQTAQASTNRIVGT YGYMSPEYAMHGRFSVKSDVYSFGVLILE  
IITGKKNSFYQTGGAPDLVSYVWNHWRDGTPLEVLDP TLTDTYSRNEVIRCIHIGLLCVQEDPAIRPAMATIVLTL  
NSYLVTLPSPQEPAFFFRSTITDEVNISSKEFLLDQSKRKSIAYSVDEVSITEVYPR

>Potri.004G024800-PtAEH2

MNSLKFYIILLSFLTLAIITLAQEDANHLYHNCQNATTSTINSTYRVNLNLLSSLASNATRNTNGFYNTSFGQNT  
DQVYGLFICRGDVSNTVCQNCVTFATKDIVQRCPIGIASIVFYDACHLRYSNRNIFSKVNQSPAYYKWNLQNITTEP  
QRFNNLVGAAVNDLAARAASAPPGAKKFSVNKTSFDAFQKIYSLAQCTPDLSSSDCNRCLSAAIARLPICSSKIGG  
RVLFPSYIHYEITEFYNATAVAEASPPPPP PPVALP SPPPPRSATIPEEKGGVSTVLIIAIVIPPIAVSIALLSMCF  
CFLRRARKTRDYVPENDVGDEITTEESLQFDLSTIEAATNNFSADNKLGEFGFGEVYRGTLPNGHQIAVKRLSKKSG  
QGAAEFKNEVVLVAKLQHRNLVVRVQGFCEGEEKILVYEFVSNKSLDYFLFDHEMQGLLDWSRRYKIIIGGIARGILY  
LHEDSRLRIIHRDLKASNILLDGDMPNKISDFGLARIFVVDQTQASTNRIVGTYGYMSPEYAMHGHFSVKSDVYSFG  
VLILEIITGKKNSSFYQTGGAADLVSYVWKHWRDGTPLEVLDPTLTDITYSRNEVIRCIHIGLLCVQEDPAIRPAMAT  
IILTLNSYSVTLPSQEPAFFFHSTITDEVNSSSKEFLLEHSSKSVAYSVDEDSITEVYPR

>Potri.003G082300-PtAEH3

MHSWVIGPQTNQRNLQFFCPCNLYINLGTPLMHLHRNVSLLFSSSLKQFISHPILIRVMAFSRAMIMLTLMLALIA  
TSIAQDSISLPPIMALTSVSTPPSSSAAPPSNTPTPPPAMTPPPVS SPPPMMSPPPSGTPPMSPGSPSSPPSPKAP  
APAPAVSQPGNGAFVHGNRMALSALLGGVAFLFV

>Potri.003G184500-PtAEH4

MPKNMKS PMTSAVFLATALAFVGLIANGAQAARILPDRIGLKVATLANYGGTY SPPPPSPIPSPRSKELTSNYEKYS  
SPPPSPKADPSIGQVTPSYGRTTASPPPPK PATPKAQLEIIRSQCTDGCISMITNLERPISSPPSPKPAPSSQ  
ITFDLEPKVHARISPPGQNVFST
