# Supplementary material for: Bioinformatic Identification and Analysis of Hydroxyproline-Rich Glycoproteins in Populus trichocarpa
Source: PubMed Central journal article supplement (PMC5073881; doi:10.1186/s12870-016-0912-3), 2016-10-21
Supplement: 12870_2016_912_MOESM3_ESM.pdf [file 12870_2016_912_MOESM3_ESM.pdf]

### Supplemental Figure 3

>Potri.010G192500

DNATLPMPLKSKEKPPKPLVGLTLRVALKDLDPDDSTRIRSFELTRPSGRPQGKIRIKLGVRERPFSPPPPPQPVYR  
ITSPQSXYSGLPDYPLPSSSPPPPVPVPHICSYHDAYSSPSPYYSGYYSSAPPPPCHQGPFLIGQWVMAAGPPHRL  
LTVLKRHKGGKRMGFGTGLAVGAVAGALGGRAL E EGLKY E E E K I A E K V E N D L A V R D D Y S D Y R S Y Y

>Potri.017G129800

MENPRLSLLSSSSPKLVMGYPTSLKNPTTPKFSISTTRPSLFPFHRTSKTVTHTSRISISALSQSHGPRRTSKNGSE  
YFASISSLSGQQTASVGVNPPQSVSPPPSQIGSPLFWVGVGVALSAIFSWVATRLKNYAMQQAFKSLTEQMNAQNNQF  
NPAFSARSPFPFSPPPASQPATSPFQTASQPAVTVDIPATKVEAAPETDARKEKETDTLEEREIKEEPRKFAFVDVS  
PEETSLNTPFSSVEDVIDTSSSKDVQFAKEASQNGATFKQGPSASEPSEGSQSSQKAGSL SVEALEKMMDDPTVQKM  
VYPYLPEEMRNPTTFKWMQLNPQYRQOLEEMLNMSGSSEWDSRMVDSLKNFDLS SPEVKQQQFDQIGL TPEEVISKI  
MANPDVALAFQNPVRVQQAIMECSQNPLSIAKYQNDKEVMDVFNKISEILG

>Potri.009G158600

MAEVINMPVDSLDRGGNGGGGGRDRKDKPPTDDPQS SPPPPPTQRRRERDSRERREDFDRPPNRRGGDYDRNRS  
PPPPQRREREREYKRRSSV SPPPPVPYRDRRHSPQRRSPPYKRSRREDGGYDARRGSPRGGFGGGDRRFG YDYGGGY  
DREMGRPGYGEERPHGRYMGRGGGYQGPPDWELGRGGYGNTSNV VPAQREGLMSYKQF IQELEDLIPSEAERRY  
QEYKSEYISTQKRVFFEAHKDEEWLKD KYHPTNLVAVIERRNELARKVAKDFLLDLQSGTLDL GPGVNAISSNKSQ  
ASDPNSDDDAETGGKRRRHGRP PAKD TDL SAAPKAHPVSSEPKRIQVDVEQAQTLVRKLDSEKGV EENILSGSEN  
MSREKSHGSSTGPV I IIRGLTSVKGLEGV ELLDTLITYLWRVHGLDYYGMIETNEAKGLRHVRAEGKSSDTSNSGTE  
WEKKLDSHWQERLRGQDPLEKMTAKEKIDATAVEGLDPYVRKIRDEKYGWYKCGAKGCTKLFHAAEFVHKHLK LKH  
LELVMELTAKVREELYYQNYMNDSDAPGGTPVMQQSMPKDKPQRRRLGPLKDERGNRRERDNRANGNERFDRSEN  
SGDFQSNDDGPDGGRNDEAMFDTFGGQGIHVSPFPSPDIAPPPVLMPPVPGAGPLGPFVPAPPEVAMRMFRDQGG  
EGGGRNARPGPQLGGPAPILLSPAFRQDPRRIRSYQDLDAPEDEVTVIDYRSL

>Potri.004G024300

MNSLKFYVILL SLLTLAILTLAQEN YLYHYCQNASTSTLNSTYRVNLNLLSSLASNATLNNTIGFYNTSFGQSTDQ  
VYGLFICRGDLSSTTVQCNCVTFATKDIVQRCPIGIASIVYYDACILRYSNVNFFSKVDQIPGFSLLNTQNTITTEPQ  
RFNNLVGATANDLAARAASAPPGAKKFAVNKTSFDAFQNIYSLAQCTPDLSSSDCNRCLSAAIARLPICSSKIGGR  
VLPFPCYIHYEISEFYNAAE SPPPPPVVLP SPPPPRSVITIEGKVS LHDLS S FIVT IYRMHSSKFKFIS

>Potri.004G196400

MAEVINMPVDSLDRGGSGGGGGRDRKDKPNTDDQS SPPPPPTQRRRERDSRERREDFDRPLNRRGGDYHDRNRS  
PPPPQRREREKEYKRRSST SPPPPLPYRDRRH SPPRRSPPYKRSRREDGGFDARRGSPRGGFGGGDRRFG YDYGGGY  
EREMGRPGYGEERSHGRYMGRGGGYQGPPSDWESGRGGHG DASNTVSAQREGLMSYKQF IQELEDLIPSEAERRY  
QEYKSEYISTQKRVFFEAHKDEEWLKD KYHPTNLVAVIERRNELARKVAKDFLLDLQSGTLDL GPGVNAISSNKSQ  
ASDLNSDDEAEAGGKRRRHGRP PAKDADLL SAAPKAHPVSSEPKRIQVDIEQAQALVCKLDSEKGV EENILSGSDNE  
KMSREKSHGSSTGPV I IIRGLTSVKGLEGV ELLDTLITYLWRVHGLDYYGMIETNEARGLRHVRTEGKSSDSSNSGT  
EWEKKL DLRWQERLRGQDPLEEMTAKEKIDAAAVEGLDPYVRKIRDEKYGWYKCGAKGCTKLFHASEFVQKHLK LK  
HPELVIDLTAKVREEL YFQNYLNDP DAPGGTPVMQQSLPKDKPQRRKL GPENRLKDERGNRRERENRANGNERFDRS  
ENPQSGDFQSNDDGPDGNCDET MFD TFGGQGIRVPPFPSPDIAPPPVLMPPVPGAGPLGPFVPAPPEVAMRMFRDQGG  
PPPFESGGRNARPGPQLGGPAPILLSPAFRQDPRRIRSYQDL DVP EDEVTVIDYRSL

>Potri.004G025200

MAVNVDIGDATDRNQFNTNLGGLMNQLITRAASSNL FAMGDTNGTAFTRIYGMVQCTPDI SPSQCRICLSGCVSF  
IPTCCNGKQGGNVLTPSCSMRFETYAFYTAPP SPPPPASSP SPPPPATSLNPSGERKASSRTIVYISVPTSAFVVL  
LFLSLC YCVVHKKARKEYNAIQEGNVGDEITSVQSLQFQLGTIEAATNNFAEENKIGKGGFGDVYRGTL PNGQHIAVK  
RLSKNSGQGAAEFKNEVVLVARLQHRNLVRL L GYCLEGE EKIL IYEFV P N K S L D Y F L F D P A K Q G L L N W S S R Y K I I G G  
IARGLLYLHEDSRLRI IHRDLKASNVLLDGEMNPK IADFGMAKIFGGDQSQGNTSK IAGTFGYMPVEIYAMHGQFSVK  
SDVYSFGVLILEIISGKKNSSFYQSDNGLDLVSYAWKQWKN GAVLELMDSSFGDSYSRNEITRCVPHIYGLLCVQEDPN  
DRPTLSTIVLMLTFSVTLP L P R E P A Y F G Q S R T V P K F P T T E L E S D R S T S K S K P L S V N D M S I T E L Y P R

>Potri.004G025600

MNSLKYVILLSLTLAITLAQEDANYLHHNCQNASTSAINSTYRVNLNLLSSLASNATRNTNGFYNTSFGQNT  
DQVYGLFICRGLDLSNTVCRNCVTFATEDIVHRCPIGIASIVYDECILRYSNVNIFSKVDQSPSFSFSLNTQNITT  
EPQRFNNLVGAAANDLAARAASAPPGAKKFAVNKTSFNAFQNIYSLAQCTPDLSSSDCNRCLSAAIAGLPNCCSSKI  
GGRVLFPSCYIHYEITEFYNATAVAASPPPPPPPPVVLPSPPPPRSVTIPEGILAM

>Potri.004G087100

MENPRLALLSSSSPPLVMGYPTSLKNPTTPKFSISTTRPSLPFSLRISKTAAPHASIFSISALANSHGHRRTSKNGKL  
GSEYFASISSSSGKQTASVGVNQPVSPPPSQIGSPLFWVGVVGLSAIFSWVATRVKNYAMQQAFKSLTEQMNTQN  
NQFNPAFSARPPFPSPPPASHPSTSPSPAASQPAITVDIPATKVEAAPTTDVGKEKETDFLEERKIKEETKKYAFV  
DISPEETS LNTPFSSVEDDNETSSSKDVEFAKKVFNQNGAAFQKQPGAAEGSQSTPGPFLSVEALEKMMEDPTMQMV  
YPYLPEEMRNPTTFKWMLQNPQYRQQLDMLNMMGGSGKWD SQMMSDLKDFDLNSAEVKQQFDQIGLTPPEEVI SKIM  
ANPDVAMAFQNPVQQAIMECSQNPINITKYQNDKEVMDVFNKISELFPGMTG

>Potri.013G105900

MAEESPPPPVLEQAPPSPAIEKDKEDLPPPAPVEEAESQAVQEKEEVPQPAAAEQKESRSSSLAAMIEKEESFSP  
PPQPLFSPEEKTEVTEKSVATKEEVAVVPTDGKEKKVPLTLVFSFKEESNALADLSHIERRALEELKQLVQEALSSHQ  
FSSAPPKKEEKQSVSVIQETSKTEAPVPDSDVGTDMKPSAENQESKVEKTPEKESQEVAKEEQKVASSSPEEVP  
IPLLKDDRSDVLLKFLRARDFKVRDAFVMIKNTIQWRRDFKIDELVDEDLGDDEKVVFMHGYDREGHPVCYNVYG  
EFQNKELYQKTFSDDEEKRLKFLRWRIQFLERSIRKLDSPGGISTIFQVNDLKNSPGPGKRELRLATKQALLSLQDN  
YPEFVAKQVFINVPPWYLA FYTVMSPFMTQRTKSKFV FAGPSNSAETL FKYI SPEQVPIQYGGLCVDFCDCNPEFTI  
ADPATDITVKPATKQTVETIIIEYKCILVWELRVVGEVVSYSAEFMPEAKDAYTIIITKPTKMSPTDEPVVSNSFKVG  
ELGKILLTVDNPTSKKKKLLYRFKINPFS

>Potri.013G054100

MEFPHGYYPQTHHRRNDEEEERREHYPPPSFDQTPPPLFYRENEFAPAPRPYSHYYQESPQPPRPYFNETNYSPPP  
PPTSIQETQVFHTSSFDQTPPPLFYGENEFAPPPRPYSHYYQESPQPPRPYFNETNYSPPPPTSIQETQVFHTSHH  
QGVDPSLDYPPAPTQVTHVSHEQTEARHSFRPHMPSFNHQHTHPGAASGLDLYNKP SFKVYSKAQPEFHILTIRGGK  
VILAPSNPSDEFQNWYKDEKYSTRVK DSEGC PAFALVNKATGQAMKHSIGEAPVQLIPYNPDVLDDESILWTESKDL  
GDGFRAVRMVNNTHLNVDAFHGDGKSGGVHDGTSIVLWKWNKGDNRWKIIPTRY

>Potri.011G029800

MGSKTIVSLLFHVIIISITLTGA EVCYNTGNFTANSTYAKNRDLVLRSLASNVTANGGFYNTTIGLGNDTVYGLVLC  
MASPSAENCSSCVNYAIQTLTAGCPNQKEAISWGGNPLPCIVRYANRYFFGSLETSPTSAYYNEGILDATFRQFEQF  
WSGLGETVKNASTGSSRLMPAVETADLPSTQKIYVFMQCTPDVSPSNCSVCLQESVDYKSCCYGNQGGVLKPNVCV  
FRWEIYTYIDLFPQVTSPPSPSPSPSPSPSPSPFPVISPPPTNTTIRK GKENTASRTVIVTIVPTAIFLALV  
ILILTVFHFRRKPKQEVENFDEISIAKCLEFKFATIKLATNDFSDDNKLGQGGFGAVYK GILADGQAI AVKRLSSNSG  
QGEVEFTNEVRL LAKLDHRNLVRL LGFCLEGTEKLLIYEFV PNSSLDQFIHDPNKR FILDWEKRYKII EGIARGILY  
LHQDQLRIIHRDLKPSNILLDGMNAKISDFGMAKLMKTDQTHDAASRIAGTFGYIAPEYARQRQFSVKSDVFSFG  
VLVLEIVSGQKPSFRDGDDEIHLTSHAWRRWREGTALDLIDPILRNDSTAAMMTCIHIGLLCVQENVADRPTMASV  
LMLSNSFTLQIPSKPAFFISRRTYRPASSSTSYTSRMTQSHLKTVPSPKNEISITELDPR

>Potri.011G029100

MGSKTIVSLLFHVIIIVSITLTGA EVCYNTGNFTANSTYAKNRDLVLRSLASNVTNNGGFYNTTIGLGNDTVYGLVLC  
MASPSAENC SRCVSSAIQTLTAGCPNQKEAISWGGNPLPCIVHYANRYFLGSLEQSPNSILYNVGILDATFRQFEQF  
WSGLGETVKNASTGSSRLMPAVETADLP SNQKAYVFMQCTPDVSPSNCSVCLQESVDYKSCCYGHQGGIVQKPNVCV  
FRWLDYPIIDLFPQVTSPPSPSPSPSPSPSPSPFPVISPPPTNTTIRK GKENTASRTVIVTIVPTAIFLALVIL  
ILTFCKFRKPKQEVKNFDEISITKWEFKFATIKLATNDFSDDNKLGQGGFGAVYK GILADGQAI AVKRLSSNSGQ  
EVEFKNEVRL LAKLDHRNLVRL LGFCLEGTEKLLIYEFV PNSSLDQFIHDPNKR FILDWEKRYKII EGIARGILYLH  
QDQLRIIHRDLKPSNILLDGMNAKISDFGMAKLMKTDQTHDAASRIAGTFGYIAPEYARQRQFSVKSDVFSFGVL  
VLEIVSGQKPSFRDGDDEMEHLTSHAWRRWREGTALDLIDPILRNDSTAAMMRCIHIGLLCVQENVADRPTMASVLLM  
LSNSFTLQIPSKPAFFISRRTYQPASSLISYTSRMTQSQLKTVPSPKNEISITELDEGR

>Potri.011G143100

MAKPTRGRPTSRSGSGSGSSRSRSYSGSDRSRSSRSRVSRSRSLSSSSSSPSRSASSGSRSPPPRKRSPA  
GARRGRSPPPQSKKVSPPPRKA SPIRESLVHVDLSTRNVNEGLREIFSNFGEVVHVELAMDRTVNLPGFGYVEF  
KTRADA EKALLYMDGAQIDGNVRAKFTLPPRQKLSPPPKPIAAAPKRDA PKTDNASADA EKDGPKRQREPSPHRKP  
LASPRRRSPVARRGSPRRQLDSPRRRRADSPGRRRVE SPYRRGETPPRRRPASPARGRSPSPSPRRYRSPLRASPR
