# Supplementary material for: Bioinformatic Identification and Analysis of Hydroxyproline-Rich Glycoproteins in Populus trichocarpa
Source: PubMed Central journal article supplement (PMC5073881; doi:10.1186/s12870-016-0912-3), 2016-10-21
Supplement: 12870_2016_912_MOESM4_ESM.pdf [file 12870_2016_912_MOESM4_ESM.pdf]

## Supplemental Figure 4

>Potri.004G168600-PtPRP1

MRILPVFRGAVLCFYVSLLLFAATFCYAGDKTVEVVGTEGCADCAESNIKTVHAFSGLRVTIDCKPENGEFKTRGFGE  
LDEEGKFKVSLPSEVVKDGLKKEECYAQLHSASAAPCPSHDGLLESSKIVLKSKTDEKHTFGLAGKLFSPVTCTSAF  
LWPHFKY PPLPKLPPLPKWKLPLKDFHHPYLFPPKVFPPFPKVF PPLPKVFPKVFPPKPPFP PPLPVYKKPLPP  
PVPIYKPEPKPPVFKPPVPPIYKKPLPPVPPIYKPEPKPPVFKPPVPPIYKPKPPVFKPPPPIYKKPLPPVPPIYK  
PEPKPPVFKPPVPPIYKKPLPPVPPIYKPEPKPPVFKPPVPPIYKPKPPVFKPPVPPIYKKPLPPVPPIYKPEPKPP  
VFKPPVPPIYKPKPPVFKPPVPVYKPKPKPIYKPLPPVPPIYKPLPPPIPKIPPYKPKLPPLPKLPPHPKIPPIY  
KPKPPVFKPPVPPIYKPEPKPIYKPLPPVPPIYKPLPPPIPKIPPYKPKLPPLPKLPPHPKIPPKYLNHP  
KFGKW PPLPPYSPIH

>Potri.016G015500-PtPRP2

MAKFALANLLILLVNLGTLTSLACPYCPYAPPSKPPQYPPKI PPVHPPPKVKPPPKYPPKI PPVHPPPKVKPPPK  
YPPKI PPVHPPPKVKPPSKYPPKI PPVHPPPKVKPPPKCPPKI PPVHPPPTVKPPHDPKPKPHPPKPPVVPKPPIV  
HPPFKPKPIVHPPYTPKPIVHPPFKPKPIVHPPFKPKPIVHPPFIPKPPYVPKPPVLPPTTPPALPPPKPPVPIP  
PIKPPTPPALPPPPLPPP PVPVTPPIKPPTPPTLPPPKPPVTPPIIMPPTPTLPPPKPPVTPPIIMPPTPTPTLPP  
PKPPVTPPIIMPAPPTLPPPKPPVTPPIKPPTPPIVNPPEPTPCPPPPPPPKQETCSIDTLKLGACVDVLGGLVH  
IGIGSSAKDACCPLQGLLDLDAIICLCTTIKAKLLNISIIPIALEVLVDCGKTPPEGFKCPA

>Potri.014G126200-PtPRP3

MALTHSSSATFLLLLLSLVIASAGGYGYDQKPDTPKPNYTYNPKQPDTSKPKYSYDPKPQPDVVKPDLHKPYDSDN  
PKPTLPKPKFTEPKPDNGYDSKPYLGQPTIPKQDTAKPNYGYNPKPEVPKPKLTMKPNHGNPKPKLI VPKPD TAK  
PNYGYNPKPEVPKPNYEVVPKPNLLKPKMTVPKPDHGYDPKEKVYEQPKSTTPKPEIITPHDGYAQKPNLPEPKLYI  
PKPGNDKLDYDYEYSPIGIEGFVLCKQGSNYTPIEGAVIRIACAVDQYGYKKVPFSCLEATNAKGYYFKTL PALK  
LTECKAYLESSPLKTCNVPTDMNYGITGAPLSAYHILHDKKIKLYSMRTFFYTSTTPTSTPAGY

>Potri.014G126500-PtPRP4

MALTHSSSATFLLLLLSLVIASAGGYGYDQKPDTPKPNYTYNPKQPDTSKPKYSYDPKPQPDVVKPDLHKPYDSDN  
PKPTLPKPKFTEPKPDNGYDSKPYLGQPTIPKPD TAKPNYGYNPKPEVPKPKLTMKPNYGNPKPKLI VPKPD TAK  
PNYGYNPKPDVPKPNYEHVPKPKMTVPKPDHGYVDPKEKVYEQPKSTTPKPEIITPHDGYAQKPNLPEPKLYIPKPS  
NDKLDYEV SPLGIEGFVLCKQGSNYTPIEGAVIRIACAVDQYGYKKVPFSCLEATNAKGYYFKTL PALKLTECKA  
YLESSPLKTCNVPTDMNYGITGAPLSAYHILHDKKIKLYSMRTFFYTSTTPTSTPAGY

>Potri.018G126000-PtPRP5

MDSTKISALLFICMIFISSATSILGCHSCGNPKNKHPKTPKGSITLPPIVKPPVTLPPIVKPPVTL PPLPVPPIVK  
PVTLPPLPVPPIVKPPVTL PPLPVPPIVKPPVTL PPLPVPPIVKPPVTL PPLPVPPIVKPPVTL PPLPVPPIVKPPV  
TL PPLPIPPVLPVPPVTL PPLPIPPVLPVPPVTL PPLPIPPVLPVPPVTVPPVITNPPKPKPCPPPPSSKDTCPIDT  
LKLGNVDLLGGLVHVGLGDPVVNQCCPVLKGLVELEAAVCLCTTLKIKALNLNIYVPLALQLLVTCGKTPPPGYTC  
SL

>Potri.009G129900-PtPRP6

MRILPVFRGALLCFYVSLVFAAAFACYADDSTAEEVVGIGECADCAQSNIKTVHAFSGLKVTIDCKPENGEFKTRGVGE  
LDEEGKFKVSLQNDVVKDGLKKEECYAQLHSASAAPCAHNGLESSKIVFKSKTDEKHTFGLAGKLFSPVTCTSAF  
LWPHPPITKPLPLPTWKLPPSKNFHHPYLFPPKPKPKPIFKPPVPPIYKPKPKPIFKPLPPPPIYKPLP PVPPI  
YKPLPPIPKIPPFHKKPCPLPKLPYKIPPKYFHHKPKFGKW PPLPPHSPH

>Potri.003G111300-PtPRP7

MGSKFAAMLFIFMIFMAISLPIYACTPCTQPHPPSYHPPTRP I VPHPKPPTTKHPPHHGGHSPSKK PPLPVVLP  
PIIINPPVITPPVIAPITNPPVITPPSSSYPPYPPGSGGPPFGGGGGGGGGGSI PGVNPPTTQPTCPINA  
LKLGACVDVLGGLVHVGLGNPVENVCCPVLKGLLELEAAICLCTSI RLKLLNLTI FIPALQLVITCGQT PPGFVC  
PPL

>Potri.006G008300-PtPRP8

MAKFAVANLLILLNLGALLTSLACPTCPYTPHPKPKRPPKPKPPVTPPIKPKPKPKPKPPVTPPIKPKPKP  
IKPKPPVTPPIKPKPPVTPPIIPPTLPPPKPPVTPVPIPTPILPPEPPVITPPIVKKPPTPKQETCPID

TLKLGACVDVLGGLVHIGIGSSAKDECCPLLEGLVDLDAAVCLCTVIKAKLLNINLILPIALELLVDCGKNPPEGFK  
CPS

>Potri.T162800-PtPRP9

MDKFALANLLILLVNSGTLTSLAYPDCTYVPVPSKLPNYPPKLPVHI PPPPPPLSPLKPLVTPSIKPPPPRRPPV  
TPPIKPPPPSLPPLNSSVIPKPPPIKPPPETPCPPHLSPELCP PPPPPPKQETCPIDTLKLGACVDVLGGLVHIR  
TGSSVNDECCPVLEGFIDLVDVASCLDIVIKAKLLNINLIIPIALKVLAECKGTPPPGFKCPA

>Potri.006G008600-PtPRP10

MAKFALANLLILLVNSGTLTSLAYPDCTYPLPSSKPPNYPPKLPVHI PPPPPPPPLRPPVTPPIKPPPPRRPPV  
TPPIKPPPPSLPPLNPPVIPKPPIVKPPPETPCPPHPSLLELCPPPPPKQETCPINTLKLGACVDVLGGLVHIRTG  
SSAKDECCPVLEGLVDFVDVASCLCTVIKAKLLNINLIIPIALEVLADCGKTPPPGFKCPA

>Potri.002G201800-PtPRP34

MALTRFFFAASILLSSLVITSANDYSYDSRTDTVKPGYHPKSDANIYDNTPKPDLPKPTLTIPKSDNEKPNYGYDS  
IPEAPLPIGIEGLVLCKSGSNYIPIKALVRIACMAVDQNGYETTPFSCLTGATDANGYVYKTLPAFGLGDLKVTEC  
KAYLES SPLETCKIPTDVNNGMSGALLSSYHILSKNIKLYSMRTFFYTSETTPTPAGGY

>Potri.017G145800-PtPRP35

MALTHFFCAASILLSLLVIASAADYGYEPKPDIVKETSYPVAPKPKPTYDTPNSGNDQPKASYPGYGYGYPGPKS  
DLPKPKPDFKYNPKPNVDLPKVTVPKIPNHGYHYIPMPHHLKPKKLSHGKPGYEPESLLPICVEGLILCKSGSNYIP  
VEGAKVRILCTGVDQNGYEATHFSCLTDAADAHGYFYKTLFPFGGLGHNLKLKECKAYLENSPLETCKIPTDVNNGI  
NGALLSSYHVLSNKNIKLYSMRTFFYTSETTSTSTTPPGGY

>Potri.001G060500-PtPRP38

MSAPMAPIIILVFLATLFAALPLSLIARPATNPTSRSISVVGVCYDCTCSTNTFSRHSYFLPGADVHIQCFNANSPKT  
REKIEFSVNRTTDRYGIYKLEVEVDGVDCEEGFAIESVCQASLIGSSSRVCNVPGLRISTNEISVKSKQNNLCIYS  
LNALSYRPSKKNITLCGSHKEELPNSLNSSKFFLPYFPYPYGFPPPLPNLPPLPNFPPLPFPLPFPPLPS  
LPFPPLPIPFLPFPPLPFPSPPSLPFPFPPLPPLPFPFPFPAPSLFHPPPPPAFNLGDPRTWIPNIPSLAPPPPPAFN  
LRDPKTWIPYIPSPSPSQNQNP

>Potri.003G167100-PtPRP40

MAPIIITHALLATLFAALPLSLIAEPANNPTSRIIIVGVVYDCTCSTNTFSRYSCFLPGADVHIQCTFQAI SPKTTEKI  
QFSANRTTDRYGIYKVTVEVDGVDCAVGSTIELVCQASLIRSSYPACNVPGLKMSTDVISVKSKQNNLCIYSMNAL  
SYRPSKKNATLCGKHKEELQISFNSSKFFLPYSPYPYGFWHTLPMNSPSPFPPLPTPSQPFPLPSPRPPSLPFPFP  
PLSPTPSLPHPTPPPPVAFNLGNPRTWIPNTPSLAPPPPPPEFNLRDPRTWIPYIPSPSPNNPQNQNP

>Potri.007G114400-PtPRP44

MANHIFPLFISPLIVIMSMSLIISQITILVEARQLLEVTLPELKPPEFPELKPPELKPKEFPPIPELKPFEIPKLP  
PKPEFPELKPPEFPKLPPEFPKPELKPFEIPKLPPELPPFPHPDLTKPTLPTIPSHSTTMLPYPASSSRVTPKLVAK  
LQHHKGFHIIVVESRGPSSLDGMPDFQFETTPDGLPLIDATTLPMVPELKPPELPEMPPLPKVELPTIPKPEL  
PKPEVPKLPPELPSFPHPPELPKTTLPTIPALPKDIKPPQSTTSP

>Potri.013G111600-PtPRP46

MLGNNGKATFGTAGIVGKLGSGGRVGLGRDDWVMGKVGKLGCGRVGMVGGKGNVFGKFKVVTAGRGGNCRWRRAAKP  
LMLKNDKAKKKEYKNTHLTMAFKCFILTLFIALAISNINVAQAARRLLQLPPLPSLPNLSKPTLPPLPTIPSLPQP  
TLPTLPTTQPSLPKPTLPPLPSLPTMPSVPKVTLPPLPSMLPLPTIPTAIPSIFLTPPPGN

>Potri.006G065500-PtPRP11

MDSTKISAFFLCMIFISSAAPTLDGSCGKHPKNKHPKTPKAPITLPPLVPPIVKPPVTLPLPVPPIVKPPVTL  
PPVTLPPVTVPPITVPPVTTKPPKPKPCPPPPSPKDTCPIDTLKLGACVDLLGGLVHIGLDPVVNQCCPVLTGLVE  
LEAAVCLCTTLKIKALNLIYVPLALQLLVTCGKTPPPGYTCSL

>Potri.001G350600-PtPRP12

MAFKAVCLMVVAVFLVTAKASYMNEDFKEKAVFSKSVVPASTPAPPEVKSPTPAPPVVTPSTPLYKPPTPAPPVKTP  
PPAPPVNPPTPVKPPTPAPPVYKPPSPAPPVNPPTPVKPPGMPPPVTRSDCTPLCGQRCKLHSRKRCLCVRACM  
TCCDRCKCVPPTYGNREKCGKCYTDMTTRRNKPKCP

>Potri.T162900-PtPRP13

MAKFAVANLVILLLSLGLLTSIACPSCSPSPHPKPPVKPPKVKPPFHPKPPIVKPPKPPVTPKPPVVKPPKPCPC  
PPPVLPVTPPIVKPPPTPIQETCPIDTLKLGACVDVGLGLIHIGIGSSAKDECCPLLEGLVDLDAAVCLCTVIKAK  
LLNINLILPIALELLVDCGKTPPEGFKCPS

>Potri.010G072200-PtPRP14

MQITSLLVLFVGVVVLATPSFADYYKPPKYEPKPPYFKPPKVEKPFPEHKPPVYKPKIEKPPVYKPPVYKPKIEK  
PPVYKPPVYKPKIEKPPVYKPPSTSHHQSTSHQSLRSHQSTSHQSLRSHQSTSLQRLRSHHPFTSHCHLMVTIRD  
TLQLKMRNISSQKTELNFYIDMQEYY

>Potri.006G008500-PtPRP15

MAKFAVANLVILLLSLGLLTSIACPSCSPSPHPKPPVKPPKVKPPPIVKPPKPPVTPKPPVVKPPKPEKPCPP  
IPVTPPIVKPPPTPKQETCPIDTLKLGACVDVGLGLIHIGIGSSAKDECCPLLEGLVDLDAAVCLCTVIKAKLLNIN  
LILPIALELLVDCGKTPPEGFKCPS

>Potri.007G113900-PtPRP16

MASFNCVFLALLIAFSFPGGEAARNLLQLPPLPAVNLKPKTLPMPMSIPTLAQPPLPTLPTTQPSLPKPTLPPLPS  
LPTTSLPKVTLPLPSMPSNIPTIPIPTTVPPTIPIPTTIPSIPFLSPPPAGN

>Potri.007G114100-PtPRP17

MASLNCFILVLFIALSFSAGEAARNLLQLPNLKPPTLPPLPSIPTLPQPTLPTLPTTQPSLPKPPALPPLPSLPVLP  
MPAVPTVTLPLPSMPSIPTIPIPTAIPSIPFFSPPPATTKP

>Potri.007G113700-PtPRP18

MASCKSFILALFIALFSSMNVSIAARHLLQLPPLPKIPMPPLPSIPNLPQPTLPTLPTTQPSLPKPTLPPLPSIPT  
IPTFTVVKVTLPLPSMPSIPTIPTIPTSIPFLSPPPATTSP

>Potri.017G047400-PtPRP19

MASRKSFILAFFIALAFSSMTVSVAARHLLQLPTLPPLPSIPNLPQPTLPTLPTTQPSLPKPTLPPLPSIPTIPTIP  
TVPKVTFPLPSMPSIPTIPTIPTSIPFLSPPPATTSP

>Potri.019G082600-PtPRP20

MAYFKCFIFALSIALAASGINVALAARHLLQLPPLPSVPMNPKPTLPPLPTIPTLPTTQPSLPKPTLPPLPSLPTMP  
SVPKVNLPPLPSMPSLPTIPTTIPSFPFLSPPPAGN

>Potri.017G047200-PtPRP21

MASFNCFILALFILLSLSGQAARHLLQLPNLKPPTLPPLPSIPALPQPTLPSLPTSQPSMPKPTMPPLPILPKIPK  
ATLPPLPSMPTLPAVVKVTLPLPSSMPSIPTIPIPTAIPSIPFLSPPPATTKP

>Potri.017G045800-PtPRP22

MASFSCFILALFIALSISGGEAARQLLQLPPLPAVNLKPKTLPMPMSIPTLPQPTLPTAQPSLPKPTLPPLPSLPT  
MPSLPKVTLPPLPSMPSMPTIPIPTTIPSIPFLSPPPAGN

>Potri.017G046700-PtPRP23

MASFNSFILALFIALSISGGEAARQLLQLPPLPAIPNLKPKTLPMPMSIPTLPQPTLPTAQPSLPKPTLPPLPSLPT  
MLSLPKVTLPPLPSMPSMPTIPIPTTIPSIPFLSPPPAGN

>Potri.017G046400-PtPRP24

MASFNSFILALFIALSISGGEATRQLLQLPPLPAVNLKPKTLPMPMSIPTLPQPTLPTAQPSLPKPTLPPLPSLPT  
MPSLPKVTLPPLPSMPSMPTIPIPTTIPSIPFLSPPPAGN

>Potri.017G045900-PtPRP25

MASFSCFILALFIALSISGGEAARQLLQLPPLPLVNLKPKTLPMPYIPTLPQPTLPTAQPSLPKPTLPPLPSLPT  
MPSLPKVTLPPLPSMPSIPTIPIPTTIPSIPFLSPPPAGN

>Potri.017G047000-PtPRP26

MASFSCFILALFIALSISGGEAAARQLLQLPPLPSVPNFVKPTLPPMPSIPTLPQPTLPTAQPSLKPPTLPPLPSLPT  
MPSLPKVTL PPLPSMPSMPTIPIPTAIPSIPFLSPPPGN

>Potri.017G047100-PtPRP27

MAAFKCLILSLFIALSFLGGEAARNLLQLPNLKPALPPLPSIPSLPQPTLPTLPTTQQPSLKPSSL PPLPSMPTLP  
TVVPKATL PPLPSMPTLPTVVPKLSL PPLPSMPSIPNIPLPTTIPSIPFLSPPPAAGN

>Potri.017G045600-PtPRP28

MASFSCFILALFIALSISGGEAAARQLLQLPPLPAVPNLKPPTLPPMPSIPTLPQPTLPTAQPSLKPPTLPPLPSLPI  
MPSTLPVVTL PPLPSMPSMPTIPIPTTIPTIPIPTTIPSIPFLSPPPGN

>Potri.017G046100-PtPRP29

MASFSYFILALFIAQSISGGEAAARQLLQLPPLPAVPNLKPPTLPPMPSIPKLPQPTLLTAQPSLKPPTLPPLPSLPT  
MPSLPKVTL PPLPSMPSMPTIPIPTTIPSIPFLSPPPGN

>Potri.T178800-PtPRP30

MAAFKCLILSLFIALSFLGGEAARNLLQLPNLKPALPPLPSIPSLPQPTLPALPTTQPSLPNPNL PPLPSLPTMPT  
MPAVPKVSL PPLPSMPTLPTVVPKASL PPLPSMPSIPNIPLPTTIPSIPFLSPPPAAGN

>Potri.007G114200-PtPRP31

MASFNCFILALLIAFSFPGGEAARNLLQLPPLPSVPNLKPPTLPPMPSMPTLPQ PPLPTLPTTQPSLKPPTLPPLPS  
LPTMPSLPKVTL PPLPSMPSNIPTIPIPTTIPSIPFLSPPPAAGN

>Potri.017G045000-PtPRP37

MAGFSCFLILAI FMALSVSGGEAAARHLLQFPPLPSVPNLKPPTLPSMPTLPQLTLPTSPKSQLSLKPPTLPPLPSLP  
TMPSLPKVAL PPLPTMPSIPFLSPPPGN

>Potri.002G201900-PtPRP39

MAPTSSYFAFFMSLSMVAAIASATDGGYGSHPNPNLVKPKLNKEKPLSTMIGVQGLVYCRSGPKRFPLEGAVIRITC  
LANDVYGYEAAPFSFLSEATDAKGYFFATLSPYEMQDNLIKIKECKAFLELSPLETCKIPTDEKQGISGALLASYHYL  
SDKKMKLFTVGFVYTSAPNSGSNY

>Potri.017G044800-PtPRP41

MSTTMANHNFPFLFILRFFPLFVISSLSMNSQTILVEARQLLEVTLPPELKPPELPKLPPLPEFPKPELPELPEFEIP  
KLPELPPFLHFPELKPALPTIPRGINPSHSTTSP

>Potri.017G044900-PtPRP42

MAYRHFPSILPLMVISMSLSMNSQTILVEARQLLEAPLPPELKPPELPKPELPELKPPEFPPELPPKPELPKFEVPQLP  
ELPTFPHLPELKPPTLPTIPKDINPSHSTASP

>Potri.018G146200-PtPRP43

MASLRLFTFISPLLLITLSLVDNTRSIEARRILETTLPKVPELKPPELPELQLPKVELPPLPKPEFPPELQKPEVPK  
LPELPPFPHLPELPKSTLPTIPALPKDIKPPQSTTSP

>Potri.007G114700-PtPRP45

MANHIFPLFISPLIVIMSMLSMNSQTILVEARQLLEVTLPPELKPPEFPPELKPPELPKLPEFPPIPELPKFEIPKLP  
PPFPHFTDLTKPTLPTIPKDINPSHSTTSP

>Potri.017G046800-PtPRP47

MLPQFFFLLQSHTVLYLLISCSYTLFQALRLSIKMASLNCFILALFIAVSLSRGEAARHLLQLPPLPSVPSLKPPTL  
PPLPSIPSLPQPTLPTLPTTQQPSLKPSSL PPLPSMPTLPTVVPKATL PPLPSMPTLPTVVPKLSL PPLPSMPSIPN  
IPLPTTIPSIPFLSPPPAAGN

>Potri.017G045700-PtPRP48

MARFNCFILALFIALSFSDEGEVARQLLQLPALPSLPNLKPPTLPPLPSIPTLPQPTLPTLPATQPSLKP PPLPPLPI  
LPTMPAIPKVTLGFRKND

>Potri.017G046500-PtPRP49

MARFNCFILALFIALSFSDGEAAHQLLQLPPLPSLPNLPKPTLPPLPSIPTLPQPTLPPLPATQPSLPKPPPLPPLPI  
LPTMPAIPKVTTLLGFRIKND

>Potri.004G114300-PtPRP32I

MPWFFIIFLLGFTFNNPSEASHGKKLPSAVVVGTVYCDTCFQEYFSRNSHFISGAHVAVECKDEKSRPSFREEAKTD  
EHGEFKVHLPFSVSKHVKKIKRCSVELLSSEPYCAVASTATSSSLRLKSRKEGTHIFSGAFFTFKPEKEPFLCNQK  
PSIENPREFSSKEASLPSFDNPTFPPPLQDPKTPVLPPLPPLPILPPLPQLPPLPPLPGLPFLPPIPANTENTKTTE  
SLKSTTLPDEKAVHHPNQFGFPTPPLFPPNPFQPPPILPPIIQPPPLFPPILPPNPLQPVPVPSLPLPPVPSLPLPP  
YHPFRCHQYLA

>Potri.004G114400-PtPRP33I

MPWFFIIFLLGFTFNNPSEASHGKKLPSAVVVGTVYCDTCFQEYFSRNSHFISGAHVAVECKDEKSRPSFREEAKTD  
EHGEFKVHLPFSVSKHVKKIKRCSVELLSSEPYCAVASTATSSSLRLKSRKEGTHIFSGAFFTFKPEKEPFLCNQK  
PSIENPREFSSKEASPPSFDNPTFPPPLQDPKTPVLPPLPPLPILPPLPQLPPLPPLPGLPFLPPIPANTENTKTTE  
SLKSTTLPDEKAVHHPNQFGFPTPPLFPPNPFQPPPILPPIIQPPPLFPPILPPNPLQPPPIQSLPLTPIPSLPLPP  
IPSLPLPPIPSLPLPPIPSLPLPPPPFPLIPPPPFSLIPPLPPLPPLIPGIPPASS

>Potri.017G100600-PtPRP36I

MPWFFIIFLLSCTFNLSAEASHGKKLPSAVVVGTVFCDTFCQEAFSRNSHFISGASVAVECKDEESRPGFREEVKT  
DEHGEFKVHLPFSVSKHVKKIKRCSVKLLSSEPFCAVASSATSSSLHLKSRKQGTHIFSSGFFTFKPEKQPILCNQ  
KPSTENSREFSSRKASLPSIDNPTFPPPLQDPTTPYLPPLNQNYLPPLVLPKLPLPQLPPLPPLPGLPLLPIPG  
NTKKTTSSEFESTTLPDQKAVHHPNQFSFPTPPLFPPNPFQPPPILPPIIQPPPLFPPILPPNPLQPPPIQSLPLTP  
PPNPIQPPPSPPLFPFPPIPGLTPPPPPPPPLFPPNPIQPPPSPPLFPFPPIPGLTPPPHPPPPPPPPFSLIPPLPPLPPL  
PPLPHLPLPPLIPGIPPASSPQKTS
